# Supplementary material for: Mapping maternal mortality rate via spatial zero-inflated models for count data: A case study of facility-based maternal deaths from Mozambique
Source: PLoS One. 2018 Nov 9;13(11):e0202186. doi: 10.1371/journal.pone.0202186 (PMC6226154; doi:10.1371/journal.pone.0202186)
Supplement: S1 File — (CSV) [file pone.0202186.s001.csv]

UPA	Distrito	Provincia	CodeProv	US_Tipo	US_type	Total_adm	Deliveries	Malaria	HIV	Other_comp	Malaria_deaths	HIV_deaths	Other_deaths	Transf_out	Transf_in	SumMortes	Mater_beds	MCH_nurses	md_sav	mch_sav	surg_sav	MCH_mater	md_mater	surg_mater	medicine_cat	medicine	equip	workload	Workload_1	Weight	mdeaths	hf3	hf4	medc2	medc3	medc4	kit2	kit3	load	north	central	local	prop_mal	trans_out	prop_hiv	trans_in	wait	ratio3	hc2
1	Cuamba	NIASSA	1	4	3	3787	3580	8	7	6	0	0	0	0	132	8	17		0						3	5	2			1.23	8	1	0	0	1	0	1	0	0	1	0	0	0.00211249	0	0.001848429	0.034856087	0		0
2	Cuamba	NIASSA	1	7	4	405	405	0	0	0	0	0	0	3	0	1	3		0	0	0				1	0	2			2.47	1	0	1	0	0	0	1	0	0	1	0	1	0	0.007407407	0	0	0	0.666666667	0
3	Cuamba	NIASSA	1	8	4	324	324	0	0	0	0	0	0	2	0	0	1		0	1	0				1	0	0			2.47	0	0	1	0	0	0	0	0	0	1	0	1	0	0.00617284	0	0	0	1	0
4	Cuamba	NIASSA	1	8	4	235	235	0	0	0	0	0	0	3	0	0	1		0	1	0				1	0	0			2.47	0	0	1	0	0	0	0	0	0	1	0	1	0	0.012765957	0	0	0	0.666666667	0
5	Cuamba	NIASSA	1	7	4	418	418	0	5	0	0	0	0	3	0	0	3		0	1	0				1	0	2			2.47	0	0	1	0	0	0	1	0	0	1	0	1	0	0.007177033	0.011961722	0	0	0.666666667	0
6	Cuamba	NIASSA	1	8	4														0								0			2.47		0	1	0	0	0	0	0	0	1	0	1					0		0
7	Lago	NIASSA	1	5	4	605	588	11	0	7	0	0	1	27	2	3	7		1	1	0				2	3	1			1.23	3	0	1	1	0	0	0	0	0	1	0	0	0.018181818	0.044628099	0	0.003305785	0	0.057142857	0
8	Lichinga	NIASSA	1	8	4	730	709	0	0	0	0	0	0	0	0	0	3		0	0	0				1	0	0			2.47	0	0	1	0	0	0	0	0	0	1	0	1	0	0	0	0	0	0.5	0
9	Lichinga	NIASSA	1	6	4	1279		0	2	4	0	0	0	42	0	1	10		0	1	0				1	2	1			2.47	1	0	1	0	0	0	0	0	0	1	0	1	0	0.032838155	0.001563722	0	0	0.095238095	0
10	Lichinga	NIASSA	1	8	4	382	439	0	0	0	0	0	0	10	0	0	6		0	0	0				1	0	0			2.47	0	0	1	0	0	0	0	0	0	1	0	1	0	0.02617801	0	0	0	0.333333333	0
11	Lichinga	NIASSA	1	3	2	8097	4293	136	146	67	1	1	3			21	25	12	1	1	0	13	1	0	1	1	2	357.75	3	1.23	11	0	0	0	0	0	1	0	1	1	0	0	0.016796344	0.001976041	0.01803137		1	0.037878788	1
12	Lichinga	NIASSA	1	8	4	387	366	0	0	1	0	0	0	19	0	0			0						1	2	0			2.47	0	0	1	0	0	0	0	0	0	1	0	0	0	0.049095607	0	0	0		0
13	Lichinga	NIASSA	1	8	4												6		0	0	0				1	0	1			2.47		0	1	0	0	0	0	0	0	1	0	1					0	0.333333333	0
14	Lichinga	NIASSA	1	8	4												4		0	0	0				1	0				2.47		0	1	0	0	0	0	0	0	1	0	1					0	1	0
15	Lichinga	NIASSA	1	5	4	537	492	7	0	3	0	0	0	35	1	1	3		0	1	0				1	1	1			1.23	1	0	1	0	0	0	0	0	0	1	0	0	0.013035382	0.065176909	0	0.001862197	0	0.111111111	0
16	Lichinga	NIASSA	1	8	4	146	148	0	0	0	0	0	0	0	0	1	0		0	0	0				1	0	0			2.47	1	0	1	0	0	0	0	0	0	1	0	1	0	0	0	0	0	1	0
17	Lichinga	NIASSA	1	8	4	178	164	0	0	0	0	0	0	0	0	0	2		0	0	0				1	0	0			2.47	0	0	1	0	0	0	0	0	0	1	0	1	0	0	0	0	0	0.666666667	0
18	Lichinga	NIASSA	1	8	4	155	155	0	0	0	0	0	0	0	0	0	1		0	0	0				1	0	0			2.47	0	0	1	0	0	0	0	0	0	1	0	1	0	0	0	0	0	1	0
19	Lichinga	NIASSA	1	8	4	1427	351	0	0	0	0	0	0	0	0	0	1	0	0	0	0	1	0	0	1	0		0	1	2.47	0	0	1	0	0	0	0	0	0	1	0	1	0	0	0	0	0	0.666666667	0
20	Majune	NIASSA	1	6	4	132		0	0	0	0	0	0	2	0	1	3		0	0	0				1	0	1			2.47	1	0	1	0	0	0	0	0	0	1	0	1	0	0.015151515	0	0	0	1	0
21	Majune	NIASSA	1	8	4														0						2	4				2.47		0	1	1	0	0	0	0	0	1	0	1					0		0
22	Majune	NIASSA	1	5	4	431	431	8	0	2	0	0	0	7	48	0	7		0	1	0						3			1.23	0	0	1	0	0	0	0	1	0	1	0	0	0.018561485	0.016241299	0	0.11136891	0	0.028571429	0
24	Mandimba	NIASSA	1	8	4	359	359	0	0	0	0	0	0	4	0	0	1		0	0	0				1	2				2.47	0	0	1	0	0	0	0	0	0	1	0	1	0	0.011142061	0	0	0	0.666666667	0
25	Mandimba	NIASSA	1	5	4	1435	1204	26	1	2	26	0	1	29	17	31			0						2	4	2			1.23	12	0	1	1	0	0	1	0	0	1	0	0	0.018118467	0.020209059	0.000696864	0.01184669	0		0
27	Marrupa	NIASSA	1	5	4	462	446	6	2	3	0	1	0	5	2	1	5		1	1	0				2	4	1			1.23	1	0	1	1	0	0	0	0	0	1	0	0	0.012987013	0.010822511	0.004329004	0.004329004	0	0.054054054	0
28	Maua	NIASSA	1	5	4	768	625	11	0	1	0	0	0	32	0	0	16	1	0	1	0	3	0	0	1	2	2	625	3	1.23	0	0	1	0	0	0	1	0	1	1	0	0	0.014322917	0.041666667	0	0	1	0.142857143	0
29	Mavago	NIASSA	1	6	4	451	451	12	2	1	0	0	1	12	2	5	4	2	0	1	0	3	0	0	4	6	0	225.5	3	2.47	5	0	1	0	0	1	0	0	1	1	0	0	0.026607539	0.026607539	0.00443459	0.00443459	0	0.043478261	0
30	Mavago	NIASSA	1	8	4	239	208	0	0	0	0	0	0	2	0	0	1		0	0	0				1	0				2.47	0	0	1	0	0	0	0	0	0	1	0	1	0	0.008368201	0	0	0	1	0
31	Mecanhelas	NIASSA	1	8	4	365	365	0	0	0	0	0	0	0	0	0	4	0	0	0	0	1	0	0	1	0		0	1	2.47	0	0	1	0	0	0	0	0	0	1	0	1	0	0	0	0	0	0.666666667	0
32	Mecanhelas	NIASSA	1	5	4	1161	1160	15	6	14	0	0	0	72		5	12		1	1	0				3	5	2			1.23	5	0	1	0	1	0	1	0	0	1	0	0	0.012919897	0.062015504	0.005167959		0	0.071428571	0
33	Mecula	NIASSA	1	5	4	280	250	7	0	5	0	0	1	10	0	1	4		0	1	0				3	5	2			1.23	1	0	1	0	1	0	1	0	0	1	0	0	0.025	0.035714286	0	0	0	0.05	0
34	Metarica	NIASSA		8	4												0		0	0	0				1	0	0			2.47		0	1	0	0	0	0	0	0	1	0	1					0	0.666666667	0
35	Metarica	NIASSA	1	5	4	599	471	0	0	0	1	0	0	14	5	1	6		0	1	0				2	3	2			1.23	1	0	1	1	0	0	1	0	0	1	0	0	0	0.023372287	0	0.008347245	0	0.035714286	0
36	Metarica	NIASSA	1	8	4	108	107	0	0	0	0	0	0	1	0	0	1		0	0	0									2.47	0	0	1	0	0	0	0	0	0	1	0	1	0	0.009259259	0	0	0	1	0
37	Metarica	NIASSA	1	8	4	0	0				0	0	0				1	0	0	1	0	1	0	0	1	0		0	1	2.47		0	1	0	0	0	0	0	0	1	0	1					0	0.666666667	0
38	Metarica	NIASSA	1	8	4	196	190	0	0	0	0	0	0	7	0	0	0		0	1	0				1	0	1			2.47	0	0	1	0	0	0	0	0	0	1	0	1	0	0.035714286	0	0	0	1	0
39	Muembe	NIASSA	1	8	4	152	152	0	0	0	0	0	0	1	0	0	2	0	0	1	0	1	0	0	1	0	1	0	1	2.47	0	0	1	0	0	0	0	0	0	1	0	1	0	0.006578947	0	0	0	1	0
40	Muembe	NIASSA	1	8	4	291	0	1	0	0	0	0	0	7	0	0	2	0	0	0	0	0	0	0				0	1	2.47	0	0	1	0	0	0	0	0	0	1	0	1	0.003436426	0.024054983	0	0	0	0.666666667	0
41	Muembe	NIASSA	1	6	4	397	13	7	6	0	1	0	0	45		4	3		0	1	0				1	0	2			2.47	4	0	1	0	0	0	1	0	0	1	0	0	0.017632242	0.113350126	0.01511335		0	0.083333333	0
42	Muembe	NIASSA	1	8	4	251	0	0	0	0	0	0	0	5	0	0	4	0	0	1	0	1	0	0	1	0	0	0	1	2.47	0	0	1	0	0	0	0	0	0	1	0	1	0	0.019920319	0	0	0	1	0
44	N'gauma	NIASSA	1	5	4	615	522	1	0	2	0	0	0	13	1	1	7		0	1	0				2	3	1			1.23	1	0	1	1	0	0	0	0	0	1	0	0	0.001626016	0.021138211	0	0.001626016	1	0.043478261	0
45	Nipepe	NIASSA	1	8	4	127	127	0	0	0	0	0	0	0	0	0	1	0	0	0	0	0	0	0	1	0	1	0	1	2.47	0	0	1	0	0	0	0	0	0	1	0	1	0	0	0	0	0	1	0
46	Nipepe	NIASSA	1	5	4	361	353	10	0	1	0	0	0	8	0	0	5		0	1	0				2	4				1.23	0	0	1	1	0	0	0	0	0	1	0	0	0.027700831	0.022160665	0		1	0.045454545	0
47	Sanga	NIASSA	1	6	4	415	397	1	0	1	0	0	0	18	0	0	6		0						2	3	1			2.47	0	0	1	1	0	0	0	0	0	1	0	1	0.002409639	0.043373494	0	0	1		0
48	Sanga	NIASSA	1	8	4	215	215	0	0	0	0	0	0	0	0	0	2		0	1	0				2	3	2			2.47	0	0	1	1	0	0	1	0	0	1	0	0	0	0	0	0	0	0.038461538	0
49	Ancuabe	CABO DELGADO	2	5	4	1001	676	66	4	9	0	1	0	35	10	3	8		1	1	0				3	5	2			1	3	0	1	0	1	0	1	0	0	1	0	0	0.065934066	0.034965035	0.003996004	0.00999001	0	0.095238095	0
50	Ancuabe	CABO DELGADO	2	6	4	404	372	1	0	0	0	0	0	12	0	1	4	1	0	1	0	1	0	0	1	0	1	372	3	2.59	1	0	1	0	0	0	0	0	1	1	0	1	0.002475248	0.02970297	0	0	0	0.666666667	0
51	Ancuabe	CABO DELGADO	2	6	4	158	156	0	0	0	0	0	0	0	0	1	3		0	1	0				1	0	1			2.59	1	0	1	0	0	0	0	0	0	1	0	1	0	0	0	0	0	0.666666667	0
52	Balama	CABO DELGADO	2	5	4	1231	1094	43	4	0	1	0	2	69	21	4	10		1	1	0				3	5	2			1	4	0	1	0	1	0	1	0	0	1	0	0	0.03493095	0.05605199	0.003249391	0.017059301	0	0.071428571	0
53	Balama	CABO DELGADO	2	7	4	138	136	0	0	0	0	0	0	1	0	2	5		0	0	0				1	0	0			2.59	2	0	1	0	0	0	0	0	0	1	0	1	0	0.007246377	0	0	0	1	0
54	Balama	CABO DELGADO	2	6	4	219	209	0	0	0	0	0	0	10	0	1	4		0	0	0				1	0	2			2.59	1	0	1	0	0	0	1	0	0	1	0	1	0	0.0456621	0	0	0	1	0
55	Chiure	CABO DELGADO	2	8	4	0	0	4	0	18	0	0	0	0	0	0	0		0	0	0				1	0		0	1	2.59	0	0	1	0	0	0	0	0	0	1	0	1					0	1	0
56	Chiure	CABO DELGADO	2	6	4	417	417	0	0	0	0	0	0	8	0	0	6		0	1	0				1	0	1			2.59	0	0	1	0	0	0	0	0	0	1	0	1	0	0.019184652	0	0	0	0.5	0
57	Chiure	CABO DELGADO	2	5	4	1639	1201	108	5	32	0	2	1	76	1	5	14		1	1	0				2	4	1			1	5	0	1	1	0	0	0	0	0	1	0	0	0.065893838	0.046369738	0.003050641	0.000610128	0	0.08	0
58	Chiure	CABO DELGADO	2	6	4	337	335	0	0	0	0	0	0	1	0	0	3		0	1	0				1	0	1			2.59	0	0	1	0	0	0	0	0	0	1	0	1	0	0.002967359	0	0	0	0.666666667	0
59	Chiure	CABO DELGADO	2	7	4	125	117	0	0	0	0	0	0	3	0	1	1		0	0	0				1	0				2.59	1	0	1	0	0	0	0	0	0	1	0	1	0	0.024	0	0	0	1	0
60	Chiure	CABO DELGADO	2	5	4	543	514	14	0	0	0	0	0	8	0	0	8		0	1	0				1	0	2			1	0	0	1	0	0	0	1	0	0	1	0	1	0.025782689	0.014732965	0	0	1	0.25	0
61	Macomia	CABO DELGADO	2	5	4	209	154	3	0	0	0	0	0	6	2	2	5		0	1	0				2	4	1			1	2	0	1	1	0	0	0	0	0	1	0	0	0.014354067	0.028708134	0	0.009569378	0	0.083333333	0
62	Macomia	CABO DELGADO	2	7	4	108	107	0	0	0	0	0	0	1	0	0	2		0	1	0				1	0	0			2.59	0	0	1	0	0	0	0	0	0	1	0	1	0	0.009259259	0	0	0	0.666666667	0
63	Macomia	CABO DELGADO	2	5	4	1204	752	150	4	55	0	0	1	28	34	2	14		1	1	0				3	5	3			1	2	0	1	0	1	0	0	1	0	1	0	0	0.124584718	0.023255814	0.003322259	0.028239203	1	0.066666667	0
64	Mecufi	CABO DELGADO	2	5	4	440	406	35	5	19	0	0	0	16	0	3	8		0	1	0				2	4	0			1	3	0	1	1	0	0	0	0	0	1	0	0	0.079545455	0.036363636	0.011363636	0	0	0.034482759	0
65	Meluco	CABO DELGADO	2	5	4	463	386	3	0	5	0	0	0	5	4	3	6		0	1	0				2	4	2			1	3	0	1	1	0	0	1	0	0	1	0	0	0.006479482	0.010799136	0	0.008639309	1	0.047619048	0
66	Pemba	CABO DELGADO	2	5	4	705	392	151	2	13	0	0	0	27	3	1	10		0	1	0				2	4	2			1	1	0	1	1	0	0	1	0	0	1	0	0	0.214184397	0.038297872	0.002836879	0.004255319	0	0.071428571	0
67	Mocimboa da Praia	CABO DELGADO	2	4	3	2739	1839	60	0	57	0	0	1	40	6	7	22		1	1	1				3	5	2			1	7	1	0	0	1	0	1	0	0	1	0	0	0.021905805	0.01460387	0	0.002190581	1	0.052631579	0
68	Montepuez	CABO DELGADO	2	6	4	242	222	0	0	0	0	0	0	21	0	0	5		0	0	0				1	0	1			2.59	0	0	1	0	0	0	0	0	0	1	0	1	0	0.08677686	0	0	1	0.666666667	0
69	Montepuez	CABO DELGADO	2	4	3	3497	2643	285	19	32	5	0	10	2	104	29	34		1	1	1				2	4	0			1	11	1	0	1	0	0	0	0	0	1	0	0	0.081498427	0.000571919	0.005433228	0.029739777	0	0.028571429	0
70	Montepuez	CABO DELGADO	2	6	4	348	339	0	0	0	0	0	0	9	0	0	5		0	1	0				1	0	1			2.59	0	0	1	0	0	0	0	0	0	1	0	1	0	0.025862069	0	0	0	0.666666667	0
71	Mueda	CABO DELGADO	2	6	4	260	258	0	0	0	0	0	0	2	0	0		0	0	1	0	1	0	0	1	0	0	0	1	2.59	0	0	1	0	0	0	0	0	0	1	0	1	0	0.007692308	0	0	0	1	0
72	Mueda	CABO DELGADO	2	4	3	1657	1320	38	0	0	0	1	0	3	93	10	19		1	1	0				3	5	2			1	10	1	0	0	1	0	1	0	0	1	0	0	0.022933011	0.001810501	0	0.056125528	0	0.035714286	0
73	Mueda	CABO DELGADO	2	6	4	247	244	0	0	0	0	0	0	3	0	0	3		0	1	0				1	0	0			2.59	0	0	1	0	0	0	0	0	0	1	0	1	0	0.012145749	0	0	0	1	0
74	Muidumbe	CABO DELGADO	2	7	4	2	30	0	0	0	0	0	0	0	0	0			0	0	0									2.59	0	0	1	0	0	0	0	0	0	1	0	1	0	0	0	0	0	1	0
75	Muidumbe	CABO DELGADO	2	6	4	248	420	0	0	0	0	0	0	7	0	0	3		0	1	0				1	0	0			2.59	0	0	1	0	0	0	0	0	0	1	0	0	0	0.028225806	0	0	0	0.5	0
76	Muidumbe	CABO DELGADO	2	5	4	699	573	9	0	0	0	0	0	37	11	0	5		0	1	0				2	4	2			1	0	0	1	1	0	0	1	0	0	1	0	1	0.012875536	0.052932761	0	0.015736767	0	0.074074074	0
77	Muidumbe	CABO DELGADO	2	6	4	75	72	0	0	0	0	0	0	3	0	0	3		0	0	0				1	0	1			2.59	0	0	1	0	0	0	0	0	0	1	0	1	0	0.04	0	0	0	1	0
78	Namuno	CABO DELGADO	2	6	4	551	551	0	0	0	0	0	0	0	0	0	4		0	0	0				1	0	1			2.59	0	0	1	0	0	0	0	0	0	1	0	1	0	0	0	0	0	1	0
79	Namuno	CABO DELGADO	2	6	4	674	674	0	0	0	0	0	0	0	0	0	4		0	1	0				1	0	0			2.59	0	0	1	0	0	0	0	0	0	1	0	1	0	0	0	0	0	1	0
80	Namuno	CABO DELGADO	2	5	4	1532	1168	97	2	21	0	0	0	38	20	0	18		1	1	0				3	5	1			1	0	0	1	0	1	0	0	0	0	1	0	0	0.063315927	0.024804178	0.001305483	0.01305483	1	0.090909091	0
81	Nangade	CABO DELGADO	2	5	4	539	440	34	0	5	0	0	0	15	0	2	6		0	1	0				4	6	1			1	2	0	1	0	0	1	0	0	0	1	0	0	0.063079777	0.027829314	0	0	1	0.0625	0
82	Nangade	CABO DELGADO	2	6	4	259	257	0	0	0	0	0	0	0	0	0	4		0	1	0				1	0	2			2.59	0	0	1	0	0	0	1	0	0	1	0	1	0	0	0	0	0	0.5	0
83	Palma	CABO DELGADO	2	5	4	912	693	50	4	0	0	0	0	26	0	2	8		1	1	0				4	6	1			1	2	0	1	0	0	1	0	0	0	1	0	0	0.054824561	0.028508772	0.004385965	0	0	0.074074074	0
84	Pemba	CABO DELGADO	2	6	4	466	402	0	0	1	0	0	0	64	0	0	6		0	1	0				2	3	1			2.59	0	0	1	1	0	0	0	0	0	1	0	0	0	0.137339056	0	0	0	0.076923077	0
85	Pemba	CABO DELGADO	2	3	2	4091	1943	192	7	58	4	0	1	1	19	39	29		1	1	0		3		3	5	2			1	12	0	0	0	1	0	1	0	0	1	0	0	0.04693229	0.000244439	0.001711073	0.004644341	0	0.066350711	1
86	Pemba	CABO DELGADO	2	6	4	1354	412	63	0	0	0	0	0	21	0	0	6		0	1	0				2	3	2			2.59	0	0	1	1	0	0	1	0	0	1	0	1	0.046528804	0.015509601	0	0	0	0.5	0
87	Pemba	CABO DELGADO	2	6	4	427	408	0	0	0	0	0	0	10	0	0	8		0	1	0				2	3	0			2.59	0	0	1	1	0	0	0	0	0	1	0	1	0	0.023419204	0	0	0	0.166666667	0
88	Quissanga	CABO DELGADO	2	5	4	224	212	2	0	3	0	0	1	3	0	3	9		0	1	0				2	4	2			1	3	0	1	1	0	0	1	0	0	1	0	0	0.008928571	0.013392857	0	0	0	0.066666667	0
89	Angoche	NAMPULA	3	4	3	3070	3002	2	0	0	1	0	0		42	11	47	4	1	1	0	6	1	0	1	2	1	750.5	3	1	10	1	0	0	0	0	0	0	1	1	0	0	0.000651466		0	0.013680782	1	0.028169014	0
90	Angoche	NAMPULA	3	7	4	421	409	0	0	0	0	0	0	7	0	0	2	0	0	0	0	1	0	0	1	0	0	0	1	2.71	0	0	1	0	0	0	0	0	0	1	0	1	0	0.016627078	0	0	0	1	0
91	Mossuril	NAMPULA	3	5	4	1059	774	113		0	0	0	0	34	0	0		2	1	1	0	6	0		1	2	2	387	3	1	0	0	1	0	0	0	1	0	1	1	0	0	0.106704438	0.03210576		0	0	0.046511628	0
92	Lalaua	NAMPULA	3	5	4	474	450	64	0	0	0	0	0	35	2	5	6	3	0	1	0	5	0	0	2	4	3	150	3	1	5	0	1	1	0	0	0	1	1	1	0	0	0.135021097	0.073839662	0	0.004219409	0	0.032258065	0
93	Lalaua	NAMPULA	3	6	4	349	320	0	0	0	0	0	0	1	0	0	2	0	0	1	0	1	0	0	2	3	2	0	1	2.71	0	0	1	1	0	0	1	0	0	1	0	1	0	0.00286533	0	0	0	0.666666667	0
94	Lalaua	NAMPULA	3	6	4	315	303	0	0	0	0	0	0	8	0	0	7		0						1	0	2			2.71	0	0	1	0	0	0	1	0	0	1	0	1	0	0.025396825	0	0	0		0
95	Lalaua	NAMPULA	3	6	4	411	410	0	0	0	0	0	0	5	0	0	4	1	0	1	0	2	0	0	1	0	0	410	3	2.71	0	0	1	0	0	0	0	0	1	1	0	1	0	0.01216545	0	0	0	0.4	0
96	Lalaua	NAMPULA	3	6	4	3	3	0	0	0	0	0	0	0	0	0	4	0	0	1	0	1	0	0	1	2	0	0	1	2.71	0	0	1	0	0	0	0	0	0	1	0	1	0	0	0	0	0	0.5	0
99	Meconta	NAMPULA	3	5	4	616	605	14	0	13	0	0	0	16	0	0	10		1	1	0				3	5	3			1	0	0	1	0	1	0	0	1	0	1	0	1	0.022727273	0.025974026	0	0	1	0.095238095	0
100	Mecuburi	NAMPULA	3	6	4	84	84	0	0	0	0	0	0	0	0	0	2	0	0	0	0	0	0	0	1	2	0	0	1	2.71	0	0	1	0	0	0	0	0	0	1	0	1	0	0	0	0	0	1	0
101	Mecuburi	NAMPULA	3	5	4	651	651	35	0		0	0	0	11	0		7	1	0	1	0	5	0	0	2	4	1	651	3	1		0	1	1	0	0	0	0	1	1	0	1	0.053763441	0.016897081	0	0	0	0.117647059	0
102	Mecuburi	NAMPULA	3	6	4	329	0	0	0	0	0	0	0	0	0	0	1	0	0	0	0	1	0	0	2	3	0	0	1	2.71	0	0	1	1	0	0	0	0	0	1	0	1	0		0		0	0.5	0
103	Mecuburi	NAMPULA	3	6	4	82	82	0	0	0	0	0	0	9	0	0	3	0	0	1	0	1	0	0	2	3		0	1	2.71	0	0	1	1	0	0	0	0	0	1	0	1	0	0.109756098	0	0	0	0.666666667	0
104	Memba	NAMPULA	3	7	4	205	202	0	0	0	0	0	0	3	0	0	4	0	0	1	0	1	0	0	1	0	0	0	1	2.71	0	0	1	0	0	0	0	0	0	1	0	1	0	0.014634146	0	0	0	0.666666667	0
105	Memba	NAMPULA	3	5	4	152	152	0	0	0	0	0	0	0	0	0		0	0	1	0	1	0	0	1	0	0	0	1	1	0	0	1	0	0	0	0	0	0	1	0	0	0	0	0	0	0	0.333333333	0
106	Memba	NAMPULA	3	5	4	922	767	80		0	0	0	0	7	0	0	15	3	1	1	0	5	1	0	3	5	3	255.666.666.666.667	3	1	0	0	1	0	1	0	0	1	1	1	0	0	0.086767896	0.007592191			0	0.086956522	0
107	Memba	NAMPULA	3	5	4	1115	901	72	0	14	0	0	0	15	0	1	12	1	1	1	0	3	1	0	2	4	2	901	3	1	1	0	1	1	0	0	1	0	1	1	0	1	0.064573991	0.013452915	0	0	0	0.157894737	0
108	Mogovolas	NAMPULA	3	6	4	506	505	0	0	0	0	0	0	2	0	0	5	1	0	1	0	2	0	0	1	0		505	3	2.71	0	0	1	0	0	0	0	0	1	1	0	1	0	0.003952569	0	0	0	0.4	0
109	Mogovolas	NAMPULA	3	5	4	1604	1604	0	0	0	0	0	0	0	0	0	14	3	0	1	0	7	1	0	4	6	2	534.666.666.666.667	3	1	0	0	1	0	0	1	1	0	1	1	0	0					0	0.047619048	0
110	Moma	NAMPULA	3	6	4	556	537	0	0	0	0	0	0	11	0	0	5	0	0	0	0	1	0	0	1	0		0	1	2.71	0	0	1	0	0	0	0	0	0	1	0	1	0	0.019784173	0	0	0	0.666666667	0
111	Moma	NAMPULA	3	6	4	1019	926	0	0	0	0	0	0	9	0	0	5	1	0	1	0	2	0	1	1	0	0	926	3	2.71	0	0	1	0	0	0	0	0	1	1	0	1	0	0.008832188	0	0	0	0.285714286	0
112	Moma	NAMPULA	3	5	4	1749	1361	2	0	0	0	0	0	18	22	8	8	4	0	1	1	8	0	1	1	0	1	340.25	3	1	8	0	1	0	0	0	0	0	1	1	0	0	0.001143511	0.010291595	0	0.012578616	0	0.05	0
113	Monapo	NAMPULA	3	5	4	1053	535	0	0	0	0	0	0	13	0	0	20	4	0	1	0	6	0	0	2	4	2	133.75	3	1	0	0	1	1	0	0	1	0	1	1	0	1	0	0.012345679	0	0	0	0.074074074	0
114	Monapo	NAMPULA	3	6	4	165	165	0	0	0	0	0	0	0	0	0	4	0	0	0	0	0	0	0	1	0		0	1	2.71	0	0	1	0	0	0	0	0	0	1	0	1	0	0	0	0	0	1	0
115	Monapo	NAMPULA	3	5	4	1321	1279	0	0	0	0	0	0	7	0	0	8	5	0	1	0	6	0	0	1	0	2	255.8	3	1	0	0	1	0	0	0	1	0	1	1	0	0	0	0.005299016	0	0	0	0.037037037	0
116	Monapo	NAMPULA	3	4	3	1332	1114	8	1	0	0	0	0	0	60	3	8	2	1	1	1	2	1	1	1	2	1	557	3	1	3	1	0	0	0	0	0	0	1	1	0	0	0.006006006	0	0.000750751	0.045045045	0	0.053571429	0
117	Monapo	NAMPULA	3	5	4	1184	570	6	0	2	0	0	0	39	0	1	7	2	0	1	0	4	0	0	3	5	3	285	3	1	1	0	1	0	1	0	0	1	1	1	0	1	0.005067568	0.032939189	0	0	1	0.086956522	0
118	Monapo	NAMPULA	3	7	4	776	680	15	0	0	0	0	0	22	0	0	6	0	0	0	0	1	0	0	1	0	2	0	1	2.71	0	0	1	0	0	0	1	0	0	1	0	1	0.019329897	0.028350515	0	0	0	0.666666667	0
119	Mongincual	NAMPULA	3	5	4	728	666	5	0	0	0	0	0	59	3	1	8	2	0	1	0	4	0	0	2	3	3	333	3	1	1	0	1	1	0	0	0	1	1	1	0	0	0.006868132	0.081043956	0	0.004120879	0	0.035714286	0
120	Mossuril	NAMPULA	3	6	4	493	345	0	0	0	0	0	0	0	8	0	2	0	0	1	0	2	0	0	1	0	0	0	1	2.71	0	0	1	0	0	0	0	0	0	1	0	1	0	0	0	0.016227181	0	0.4	0
121	Mossuril	NAMPULA	3	7	4	155	153	0	0	0	0	0	0	2	0	0	3	0	0	0	0	1	0	0	1	0	1	0	1	2.71	0	0	1	0	0	0	0	0	0	1	0	1	0	0.012903226	0	0	0	0.666666667	0
122	Mossuril	NAMPULA	3	5	4	576	425	69	0	0	0	0	0	37	0	1	8	2	1	1	0	4	1	0	2	4		212.5	3	1	1	0	1	1	0	0	0	0	1	1	0	0	0.119791667	0.064236111	0	0	0	0.068965517	0
123	Mossuril	NAMPULA	3	6	4	396	392	0	0	0	0	0	0	5	0	0	4	1	0	1	0	3	0	0	2	4	0	392	3	2.71	0	0	1	1	0	0	0	0	1	1	0	1	0	0.012626263	0	0	0	0.2	0
124	Muecate	NAMPULA	3	7	4	131	123	2	0	0	0	0	0	8	0	0	4	0	0	1	0	1	0	0	1	0	1	0	1	2.71	0	0	1	0	0	0	0	0	0	1	0	1	0.015267176	0.061068702	0	0	0	0.666666667	0
125	Muecate	NAMPULA	3	5	4	1123	80	22	0	12	0	0	0	82	0	2	12	1	0	1	0	6	0	0	2	4	2	80	3	1	2	0	1	1	0	0	1	0	1	1	0	0	0.019590383	0.0730187	0		1	0.035714286	0
126	Murrupula	NAMPULA	3	6	4	609	541	1	0	0	0	0	0	4	0	0	3	0	0	1	0	1	0	0	1	0		0	1	2.71	0	0	1	0	0	0	0	0	0	1	0	1	0.001642036	0.006568144	0	0	0	0.666666667	0
127	Murrupula	NAMPULA	3	5	4	1556	1436	32	0	8	0	0	0	120	0	5	11	3	1	1	0	4	1	0	2	4	3	478.666.666.666.667	3	1	5	0	1	1	0	0	0	1	1	1	0	0	0.020565553	0.077120823	0		0	0.043478261	0
128	Nacala Velha	NAMPULA	3	5	4	673	560	44	0	0	0	0	0	34	0	0	8	2	0	1	0	5	0	0	2	4	2	280	3	1	0	0	1	1	0	0	1	0	1	1	0	0	0.0653789	0.050520059	0	0	0	0.035714286	0
129	Nacala Velha	NAMPULA	3	6	4	349	229	0	0	0	0	0	0	0	0	0	3	0	0	1	0	1	0	0	1	0	2	0	1	2.71	0	0	1	0	0	0	1	0	0	1	0	1	0	0	0	0	0	0.666666667	0
130	Nacala Velha	NAMPULA	3	6	4	727	710	0	0	0	0	0	0	0	0	0	6	1	0	1	0	3	0	0	1	0	1	710	3	2.71	0	0	1	0	0	0	0	0	1	1	0	1	0	0	0	0	0	0.666666667	0
131	Nacala Velha	NAMPULA	3	2	2	3918	3741	0	0	0	3	0	1	6	48	9	42	8	1	1	1	14	2	1	1	1	3	467.625	3	1	9	0	0	0	0	0	0	1	1	1	0	0	0	0.001531394	0	0.012251149	0	0.040540541	1
132	Nacala Velha	NAMPULA	3	6	4	431	429	1	0	0	0	0	0	4	0	0	5	1	0	1	0	2	0	0	1	0	2	429	3	2.71	0	0	1	0	0	0	1	0	1	1	0	1	0.002320186	0.009280742	0	0	0	0.5	0
133	Erati	NAMPULA	3	6	4	279	273	0	0	0	0	0	0	2	0	0	4	0	0	1	0	1	0	0	1	0		0	1	2.71	0	0	1	0	0	0	0	0	0	1	0	1	0	0.007168459	0	0	0	0.5	0
134	Erati	NAMPULA	3	5	4	714	711	0	3	0	0	0	0	50	0	0	10	3	0	1	0	5	0	0	3	5	1	237	3	1	0	0	1	0	1	0	0	0	1	1	0	0	0	0.070028011	0.004201681	0	0	0.037037037	0
135	Erati	NAMPULA	3	6	4	174	171	0	0	0	0	0	0	1	0	0	4	0	0	1	0	1	0	0	1	0		0	1	2.71	0	0	1	0	0	0	0	0	0	1	0	1	0	0.005747126	0	0	0	0.5	0
136	Namapa	NAMPULA	3	5	4	1167	938	0	0	0	0	0	0	0	0	0	12	1	1	1	0	4	0	0	2	4	2	938	3	1	0	0	1	1	0	0	1	0	1	1	0	1					1	0.103448276	0
137	Namapa	NAMPULA	3	5	4	428	456	1	0	0	0	1	0	3	0	1	7	1	0	1	0	4	0	0	2	4	1	456	3	1	1	0	1	1	0	0	0	0	1	1	0	1	0.002336449	0.007009346	0	0	0	0.133333333	0
138	Namapa	NAMPULA	3	4	3	951	906	0	0	0	0	0	0	63	69	4	16	4	1	1	1	6	1	0	1	2	2	226.5	3	1	4	1	0	0	0	0	1	0	1	1	0	0	0	0.066246057	0	0.072555205	1	0.094339623	0
139	Namapa	NAMPULA	3	7	4	737	723	0	0	0	0	0	0	15	0	1	4	0	0	1	0	1	0	0	1	0		0	1	2.71	1	0	1	0	0	0	0	0	0	1	0	1	0	0.020352782	0	0	0	0.5	0
140	Namapa	NAMPULA	3	8	4	117	117	0	0	0	0	0	0	0	0	0	2	0	0	0	0	0	0	0	1	0	2	0	1	2.71	0	0	1	0	0	0	1	0	0	1	0	1	0	0	0	0	0	1	0
141	Namapa	NAMPULA	3	6	4	334	318	0	0	0	0	0	0	18	0	0	4	0	0	1	0	1	0	0	1	0	1	0	1	2.71	0	0	1	0	0	0	0	0	0	1	0	1	0	0.053892216	0	0	1	0.666666667	0
142	Nampula	NAMPULA	3	5	4	1688	1640	42	1	26	0	0	0	102	0	1	14	2	1	1	0	7	1	0	1	0	1	820	3	1	1	0	1	0	0	0	0	0	1	1	0	1	0.024881517	0.06042654	0.000592417	0	0	0.090909091	0
143	Nampula	NAMPULA	3	6	4	526	506	0	0	0	0	0	0	20	0	0	5	0	0	1	0	1	0	0	1	0	0	0	1	2.71	0	0	1	0	0	0	0	0	0	1	0	1	0	0.038022814	0	0	0	0.666666667	0
144	Nampula	NAMPULA	3	5	4	1115	1015	23		0	0	0	0	80	0	1	11	3	0	1	0	6	0	0	4	6	0	338.333.333.333.333	3	1	1	0	1	0	0	1	0	0	1	1	0	0	0.020627803	0.071748879		0	0	0.03125	0
145	Nampula	NAMPULA	3	5	4	7816	7714	0	0	0	0	0	0	117	0	3	23	4	1	1	0	14	0	0	4	6	1	1928.5	3	1	3	0	1	0	0	1	0	0	1	1	0	0	0	0.014969294	0	0	0	0.027777778	0
146	Nampula	NAMPULA	3	1	1	11931	11029	189		45	2	5	0	0	669	84	90	36	1	1	0	36	5	0	1	1	1	306.361.111.111.111	3	1	14	0	0	0	0	0	0	0	1	1	0	0	0.015841086	0		0.056072416	0	0.056390977	0
147	Nampula	NAMPULA	3	2	2	1111	1134	0	0	0	0	0	0	6		6	5	1	1	1	1	5	1	0	3	5	1	1134	3	1	6	0	0	0	1	0	0	0	1	1	0	1	0	0.00540054	0		0	0.0625	1
148	Ribaue	NAMPULA	3	8	4	0	0	0	0	0	0	0	0	0	0	0	1	0	0	0	0	0	0	0	1	0		0	1	2.71	0	0	1	0	0	0	0	0	0	1	0	1					0	1	0
149	Ribaue	NAMPULA	3	5	4	576	555	0	0	0	0	0	0	12	0	1	10	1	0	1	0	3	0	0	2	4	1	555	3	1	1	0	1	1	0	0	0	0	1	1	0	1	0	0.020833333	0	0	0	0.105263158	0
150	Ribaue	NAMPULA	3	6	4	711	1	1	7	3	0	0	0	28	0	1	7	1	0	1	0	2	0	0	2	3	0	1	1	2.71	1	0	1	1	0	0	0	0	0	1	0	1	0.00140647	0.039381153	0.009845288	0	0	0.5	0
151	Ribaue	NAMPULA	3	6	4	776	704	0	0	0	0	0	0	53	0	0	5	1	0	1	0	2	0	0	2	3		704	3	2.71	0	0	1	1	0	0	0	0	1	1	0	1	0	0.068298969	0	0	0	0.2	0
152	Ribaue	NAMPULA	3	4	3	920	920	0	0	0	0	0	0	12	50	3	17	5	1	1	1	8	1	1	1	1	2	184	3	1	3	1	0	0	0	0	1	0	1	1	0	0	0	0.013043478	0	0.054347826	0	0.031746032	0
153	Alto Molocue	ZAMBEZIA	4	4	3	2072	1987	14	0	2	0	0	0	19	2	3	18	4	1	1	0	6	1	1	1	1	2	496.75	3	1	3	1	0	0	0	0	1	0	1	0	1	0	0.006756757	0.009169884	0	0.000965251	1	0.030769231	0
154	Alto Molocue	ZAMBEZIA		8	4												3	1	0	1	0	1	0	0	1	0	0			2.84		0	1	0	0	0	0	0	0	0	1	1					0	0.5	0
157	Gile	ZAMBEZIA	4	5	4	1642	1234	0	0	0	0	0	0	64	25	2	8	3	1	1	0	3	1	0	2	3	2	411.333.333.333.333	3	1	2	0	1	1	0	0	1	0	1	0	1	0	0	0.038976857	0	0.015225335	1	0.060606061	0
158	Gile	ZAMBEZIA	4	6	4	787	735	1	0	0	0	0	1	7	0	2	3	1	0	1	0	2	0	0	1	0	1	735	3	2.84	2	0	1	0	0	0	0	0	1	0	1	1	0.001270648	0.008894536	0	0	1	0.5	0
159	Gile	ZAMBEZIA	4	6	4	526	482	0	0	0	0	0	0	22	0	0	6	0	0	0	0	0	0	0	2	4	1	0	1	2.84	0	0	1	1	0	0	0	0	0	0	1	1	0	0.041825095	0	0	0	0.5	0
160	Gurue	ZAMBEZIA	4	4	3	2371	2075	110	34	116	0	0	0	0	185	13	32	5	1	1	1	7	1	1	3	5	2	415	3	1	10	1	0	0	1	0	1	0	1	0	1	0	0.046393927	0	0.014339941	0.078026149	1	0.042253521	0
161	Gurue	ZAMBEZIA	4	6	4	1470	1461	0	0	0	0	0	0	9	0	0	3	1	0	1	0	1	0	0	1	0		1461	3	2.84	0	0	1	0	0	0	0	0	1	0	1	1		0.006122449		0	0	0	0
162	Gurue	ZAMBEZIA	4	6	4	521	487	0	0	0	0	0	0	33	0	2	3	0	0	0	0	1	0	0	1	0		0	1	2.84	2	0	1	0	0	0	0	0	0	0	1	1	0	0.063339731	0	0	0	1	0
163	Gurue	ZAMBEZIA	4	6	4	254	254	0	0	0	0	0	0	0	0	0	3	0	0	0	0	0	0	0	1	0	1	0	1	2.84	0	0	1	0	0	0	0	0	0	0	1	1	0	0	0	0	0	1	0
164	Gurue	ZAMBEZIA	4	5	4	398	583	0	0	0	0	0	0	12	0	0	0	0	0	0	0	0	0	0				0	1	1	0	0	1	0	0	0	0	0	0	0	1	1	0	0.030150754	0	0	0	1	0
165	Ile	ZAMBEZIA	4	6	4	383	375	0	0	0	0	0	0	3	0	0	3	0	0	1	0	1	0	0	1	0	1	0	1	2.84	0	0	1	0	0	0	0	0	0	0	1	1	0	0.007832898	0	0	0	1	0
166	Ile	ZAMBEZIA	4	5	4	992	709	18	0	0	0	0	0	128	0	0	11	4	0	1	0	6	0	0	2	4		177.25	3	1	0	0	1	1	0	0	0	0	1	0	1	0	0.018145161	0.129032258	0	0	0	0.022222222	0
167	Inhassunge	ZAMBEZIA	4	7	4	190	186	0	0	0	0	0	0	0	0	0		1	0	1	0	1	0	0	1	0	0	186	3	2.84	0	0	1	0	0	0	0	0	1	0	1	0					0	0.25	0
168	Inhassunge	ZAMBEZIA	4	6	4	428	427	0	0	0	0	0	0	0	0	0	4	1	0	1	0	1	0	0				427	3	2.84	0	0	1	0	0	0	0	0	1	0	1	1					0	0.5	0
169	Inhassunge	ZAMBEZIA	4	5	4	581	581	0	0	0	0	0	0	0	0	3	8	4	0	1	0	4	0	0	3	5		145.25	3	1	3	0	1	0	1	0	0	0	1	0	1	0	0	0	0	0	0	0.03030303	0
171	Lugela	ZAMBEZIA	4	6	4	269	252	0	0	0	0	0	0	14	0	0	4	1	0	0	0	1	0	0				252	3	2.84	0	0	1	0	0	0	0	0	1	0	1	1	0	0.05204461	0	0	0	1	0
172	Lugela	ZAMBEZIA	4	6	4	421	412	0	0	0	0	0	0	6	0	0	4	0	0	1	0	1	0	0	1	0	1	0	1	2.84	0	0	1	0	0	0	0	0	0	0	1	1	0	0.014251781	0	0	0	0.666666667	0
173	Lugela	ZAMBEZIA	4	5	4	577	497	0	0	0	0	0	0	40	0	0	9	2	0	1	0	2	0	0	2	3	2	248.5	3	1	0	0	1	1	0	0	1	0	1	0	1	0	0	0.06932409	0	0	0	0.015151515	0
174	Maganja da Costa	ZAMBEZIA	4	5	4	1817	1437	24	0	7	0	0	0	77	0	2	14	6	1	1	0	6	0	0	3	5		239.5	3	1	2	0	1	0	1	0	0	0	1	0	1	0	0.013208586	0.042377545	0	0	1	0.05	0
175	Maganja da Costa	ZAMBEZIA	4	6	4	328	325	0	0	0	0	0	0	3	0	10	4	1	0	1	0	1	0	0	1	0	1	325	3	2.84	10	0	1	0	0	0	0	0	1	0	1	1	0	0.009146341	0	0	0	1	0
176	Maganja da Costa	ZAMBEZIA	4	6	4	396	386	0	0	0	0	0	0	10	0	0	3	1	0	1	0	1	0	0	1	0		386	3	2.84	0	0	1	0	0	0	0	0	1	0	1	1	0	0.025252525	0	0	0	0.5	0
177	Maganja da Costa	ZAMBEZIA	4	6	4	711	685	0	0	0	0	0	0	17	0	1	10	0	0	1	0	1	0	0	1	0	1	0	1	2.84	1	0	1	0	0	0	0	0	0	0	1	1	0	0.023909986	0	0	1	1	0
178	Maganja da Costa	ZAMBEZIA	4	6	4	523	499	0	0	0	0	0	0	8	0	0	3	1	0	1	0	1	0	0	1	0		499	3	2.84	0	0	1	0	0	0	0	0	1	0	1	1	0	0.015296367	0	0	0	0.666666667	0
179	Milange	ZAMBEZIA	4	6	4	719	714	0	0	0	0	0	0	1	0	0	3	0	0	1	0	1	0	0	1	0		0	1	2.84	0	0	1	0	0	0	0	0	0	0	1	1	0	0.001390821	0	0	0	0.666666667	0
180	Milange	ZAMBEZIA	4	7	4	270	269	0	0	0	0	0	0	0	0	0	3	2	1	1	0	5	2	0	1	0	1	134.5	3	2.84	0	0	1	0	0	0	0	0	1	0	1	0	0	0	0	0	1	0.083333333	0
181	Milange	ZAMBEZIA	4	5	4	2734	2178	38	0	41	1	0	0	96	0	1	8	0	0	0	0	1	0	0	3	5	2	0	1	1	1	0	1	0	1	0	1	0	0	0	1	1	0.013899049	0.035113387	0		1	1	0
182	Mocuba	ZAMBEZIA	4	6	4	488	455				0	0	0	5	0	0	3	0	0	0	0	1	0	0	1	1		0	1	2.84	0	0	1	0	0	0	0	0	0	0	1	1		0.010245902		0	0	1	0
183	Mocuba	ZAMBEZIA	4	4	3	5038	3878	1	1	0	0	0	2	0	0	12	38	7	1	1	1	9	1	1	3	5	3	554	3	1	10	1	0	0	1	0	0	1	1	0	1	0	0.000198491		0.000198491		1	0.038461538	0
184	Mocuba	ZAMBEZIA	4	5	4	1640	1370	0	0	0	0	0	0	48	0	0	6	1	0	1	0	1	0	0	1	0		1370	3	1	0	0	1	0	0	0	0	0	1	0	1	1		0.029268293			0	0.166666667	0
185	Mopeia	ZAMBEZIA	4	5	4	889	850	0	0	0	0	0	0	4	1	3	10	2	1	1	0	4	1	0	2	4	2	425	3	1	3	0	1	1	0	0	1	0	1	0	1	0	0	0.004499438	0	0.001124859	0	0.064516129	0
186	Morrumbala	ZAMBEZIA	4	6	4	602	591	0	0	0	0	0	0	3	0	0	4	1	0	1	0	1	0	0	1	0	0	591	3	2.84	0	0	1	0	0	0	0	0	1	0	1	1	0	0.004983389	0	0	0	0.666666667	0
187	Morrumbala	ZAMBEZIA	4	6	4	373	332	0	0	0	0	0	0	10	0	3	3	1	0	1	0	1	0	0	1	0	1	332	3	2.84	3	0	1	0	0	0	0	0	1	0	1	1	0	0.026809651	0	0	0	0.4	0
188	Morrumbala	ZAMBEZIA	4	5	4	2059	1808	0	0	0	0	0	0	47	0	2	11	3	1	1	0	5	2	0	3	5	1	602.666.666.666.667	3	1	2	0	1	0	1	0	0	0	1	0	1	0	0	0.022826615	0		0	0.081081081	0
189	Morrumbala	ZAMBEZIA	4	6	4	799	804	0	0	0	0	0	0	0	0		2	1	0	1	0	1	0	0	1	0	0	804	3	2.84		0	1	0	0	0	0	0	1	0	1	1	0		0		0	0.666666667	0
190	Morrumbala	ZAMBEZIA	4	6	4	473	468	1	0	0	0	0	0	3	0	0	4	0	0	0	0	1	0	0	1	0	0	0	1	2.84	0	0	1	0	0	0	0	0	0	0	1	1	0.002114165	0.006342495	0	0	0	0.666666667	0
191	Namacurra	ZAMBEZIA	4	5	4	799	776	0	0	0	0	0	0	6	5	0	8	1	0	1	0	2	0	0	1	0		776	3	1	0	0	1	0	0	0	0	0	1	0	1	1		0.007509387		0.006257822	0	0.1	0
192	Namacurra	ZAMBEZIA	4	6	4	591	591	0	0	0	0	0	0	7	7	0	3	0	0	0	0	1	0	0	1	0	2	0	1	2.84	0	0	1	0	0	0	1	0	0	0	1	1	0	0.777777778	0	0.777777778	1	0.666666667	0
193	Namacurra	ZAMBEZIA	4	5	4	1081	1081	0	0	0	0	0	0	1	0	2	11	5	1	1	0	9	1	0	2	3	2	216.2	3	1	2	0	1	1	0	0	1	0	1	0	1	0	0	0.017241379	0	0	1	0.04	0
194	Namarroi	ZAMBEZIA	4	6	4	473	425	0	0	0	0	0	0	7	0	0	5	1	0	1	0	1	0	0	1	0		425	3	2.84	0	0	1	0	0	0	0	0	1	0	1	1	0	0.014799154	0	0	0	0.666666667	0
195	Namarroi	ZAMBEZIA	4	6	4	294	289	0	0	0	0	0	0	3	0	0	6	1	0	1	0	1	0	0	1	0		289	3	2.84	0	0	1	0	0	0	0	0	1	0	1	1	0	0.010204082	0	0	0	1	0
196	Namarroi	ZAMBEZIA	4	5	4	627	451	31	0	0	1	0	1	60	0	2	8	4	0	0	0	4	1	0	3	5		112.75	3	1	2	0	1	0	1	0	0	0	1	0	1	0	0.049441786	0.09569378	0	0	0	0.066666667	0
197	Namarroi	ZAMBEZIA	4	6	4	432	305	0	0	0	0	0	0	12		0	5	1	0	1	0	1	0	0	1	0		305	3	2.84	0	0	1	0	0	0	0	0	1	0	1	1		0.027777778			1	0.5	0
198	Nicoadala	ZAMBEZIA	4	6	4	278	272	0	0	0	0	0	0	4	0	0	3	1	0	0	0	1	0	0	1	0		272	3	2.84	0	0	1	0	0	0	0	0	1	0	1	1	0	0.014388489	0	0	0	1	0
199	Nicoadala	ZAMBEZIA	4	7	4	446	445							1			3	0	0	0	0	0	0	0	1	0	1	0	1	2.84		0	1	0	0	0	0	0	0	0	1	1		0.002242152			1	0.5	0
200	Nicoadala	ZAMBEZIA	4	6	4	923	881	0	0	0	0	0	0	29	0	0	3	1	0	0	0	1	0	0	2	3		881	3	2.84	0	0	1	1	0	0	0	0	1	0	1	1	0	0.031419285	0	0	0	0.666666667	0
201	Nicoadala	ZAMBEZIA	4	5	4	1530	1530	0	0	0	0	0	0	3	0	15	15	5	0	1	0	6	1	0	3	5	2	306	3	1	10	0	1	0	1	0	1	0	1	0	1	0	0	0.022727273	0	0	0	0.083333333	0
202	Nicoadala	ZAMBEZIA	4	6	4	0	0	0	0	0	0	0	0	5	3	0		0	0	1	0	1	0	0				0	1	2.84	0	0	1	0	0	0	0	0	0	0	1	1					0	0.4	0
203	Pebane	ZAMBEZIA	4	7	4	261	255	0	0	0	0	0	0	3	0	0	2	1	0	1	0	1	0	0				255	3	2.84	0	0	1	0	0	0	0	0	1	0	1	1	0	0.011494253	0	0	0	1	0
204	Pebane	ZAMBEZIA	4	6	4	100	99	0	0	0	0	0	0	0	0	0	2	0	0	0	0	0	0	0			0	0	1	2.84	0	0	1	0	0	0	0	0	0	0	1	1	0	0	0	0	0	1	0
205	Pebane	ZAMBEZIA	4	5	4	840	502	62	0	29	1	0	0	21	0	10	11	4	1	1	0	4	1	0	3	5	3	125.5	3	1	10	0	1	0	1	0	0	1	1	0	1	0	0.073809524	0.025	0	0	1	0.066666667	0
206	Nicoadala	ZAMBEZIA	4	3	2	3818	3503				1	2	1	0	0	23	60	21	1	1	1	21	2	1	3	5	3	166.809.523.809.524	3	1	11	0	0	0	1	0	0	1	1	0	1	0		0			0	0.044705882	1
207	Angonia	TETE	5	5	4	1331	1040	62	41	7	0	0	0	7	0	1	11	2	0	1	0	3	0	0	2	4	2	520	3	1.07	1	0	1	1	0	0	1	0	1	0	1	1	0.046581518	0.005259204	0.030803907		1	0.142857143	0
208	Angonia	TETE	5	4	3	2372	2377	35	0	0	0	0	0	0	0	11	20	5	1	1	1	6	3	1	1	1	3	475.4	3	1.07	10	1	0	0	0	0	0	1	1	0	1	0	0.014755481				1	0.074074074	0
209	Cahora Bassa	TETE	5	7	4												1	0	0	0	0	0	0	0	1	0		0	1	2.79		0	1	0	0	0	0	0	0	0	1	1					0	1	0
210	Cahora Bassa	TETE	5	5	4	994	945	0	0	0	0	0	0	39	0	0	9	3	0	1	0	3	0	0	3	5	3	315	3	1.07	0	0	1	0	1	0	0	1	1	0	1	1		0.039235412			0	0.111111111	0
211	Cahora Bassa	TETE	5	4	3	732	732	100	0	0	0	0	0	0	0	32	15	4	1	1	1	5	1	1	4	6		183	3	1.07	12	1	0	0	0	1	0	0	1	0	1	0	0.136612022				0	0.06122449	0
212	Changara	TETE	5	5	4	702	512	32	67	0	0	0	0	0	0	0	7	3	0	1	0	6	0	0	1	2	2	170.666.666.666.667	3	1.07	0	0	1	0	0	0	1	0	1	0	1	0	0.045584046		0.095441595		0	0.034482759	0
214	Changara	TETE	5	8	4												0	0	0	0	0	0	0	0	1	0		0	1	2.79		0	1	0	0	0	0	0	0	0	1	1					0	1	0
215	Changara	TETE	5	7	4	264	260	0	0	0	0	0	0	1	0	0	3	1	0	1	0	1	0	0	1	0		260	3	2.79	0	0	1	0	0	0	0	0	1	0	1	1	0	0.003787879	0	0	0	0.666666667	0
216	Chifunde	TETE	5	5	4	134	134	0	0	0	0	0	0	0	0	0	0	2	0	1	0	2	0	0	3	5	2	67	3	1.07	0	0	1	0	1	0	1	0	1	0	1	0					0	0.1	0
217	Chifunde	TETE	5	6	4	198	198	0	4	0	0	0	0	0	0	0	3	1	0	1	0	1	0	0	2	4	0	198	3	2.79	0	0	1	1	0	0	0	0	1	0	1	1			0.02020202		0	0.4	0
218	Chifunde	TETE	5	6	4	135	125	0	0	0	0	0	0	0	0	0	3	1	0	1	0	1	0	0	2	4	2	125	3	2.79	0	0	1	1	0	0	1	0	1	0	1	1	0	0	0	0	0	0.666666667	0
219	Chiuta	TETE	5	7	4	402	397	0	0	0	0	0	0	0	3	0	6	0	0	1	0	1	0	0	1	0	1	0	1	2.79	0	0	1	0	0	0	0	0	0	0	1	1		0		0.007462687	0	0.5	0
220	Chiuta	TETE	5	5	4	735	684	2	0	0	0	0	0	0	0	1	6	2	0	1	0	3	0	0	3	5	0	342	3	1.07	1	0	1	0	1	0	0	0	1	0	1	0	0.002721088				0	0.055555556	0
221	Macanga	TETE	5	8	4	3389	3389	0	0	0	0	0	0	0	0	0	4	0	0	1	0	1	0	0	2	3	2	0	1	2.79	0	0	1	1	0	0	1	0	0	0	1	1					0	0.4	0
222	Macanga	TETE	5	6	4	1102	1076	0	0	0	0	0	0	14	0	0	8	4	0	1	0	5	0	0	2	3		269	3	2.79	0	0	1	1	0	0	0	0	1	0	1	0		0.012704174			0	0.05	0
224	Magoe	TETE	5	5	4	344	223	12	4	0	0	0	0	27	0	0	5	2	0	1	0	2	0	0	3	5		111.5	3	1.07	0	0	1	0	1	0	0	0	1	0	1	0	0.034883721	0.078488372	0.011627907		0	0.058823529	0
225	Maravia	TETE	5	6	4	57	57	0	0	0	0	0	0	0	0	0	1	0	0	0	0	0	0	0	1	0	0	0	1	2.79	0	0	1	0	0	0	0	0	0	0	1	1	0	0	0	0	0	1	0
226	Maravia	TETE	5	8	4	139	139	0	0	0	0	0	0	0	0	0	0	0	0	1	0	1	0	0	1	0	0	0	1	2.79	0	0	1	0	0	0	0	0	0	0	1	1	0	0	0	0	0	0.666666667	0
227	Maravia	TETE	5	5	4	304	304	3	33	0	0	0	0	14	0	17	4	2	0	1	0	2	0	0	2	4	2	152	3	1.07	10	0	1	1	0	0	1	0	1	0	1	0	0.009868421	0.046052632	0.108552632		0	0.045454545	0
228	Moatize	TETE		8	4												2	0	0	1	0	1	0	0	1	0	0	0	1	2.79		0	1	0	0	0	0	0	0	0	1	1					0	0.666666667	0
229	Moatize	TETE	5	5	4	2073	1734	88	1	0	0	0	0	87	0	57	11	5	1	1	0	6	1	0	4	6	3	346.8	3	1.07	14	0	1	0	0	1	0	1	1	0	1	0	0.042450555	0.041968162	0.000482393		0	0.037037037	0
230	Moatize	TETE	5	7	4	734	734	0	0	0	0	0	0	0	0	0	4	3	0	0	0	3	0	0	1	0	1	244.666.666.666.667	3	2.79	0	0	1	0	0	0	0	0	1	0	1	1					1	0.25	0
231	Moatize	TETE	5	6	4	1067	999	8	0	0	0	0	0	0	0	1	4	3	0	1	0	4	0	0	3	5	3	333	3	2.79	1	0	1	0	1	0	0	1	1	0	1	1	0.007497657				0	0.105263158	0
233	Mutarara	TETE	5	6	4	305	305	0	0	0	0	0	0	0	0	0	2	1	0	1	0	1	0	0	1	0	0	305	3	2.79	0	0	1	0	0	0	0	0	1	0	1	1					0	0.5	0
235	Mutarara	TETE	5	6	4	6	6	0	0	0	0	0	0	0	0	0	2	0	0	0	0	0	0	0	2	3	1	0	1	2.79	0	0	1	1	0	0	0	0	0	0	1	1	0	0	0	0	0	1	0
236	Mutarara	TETE	5	4	3	1664	1664	0	0	0	0	0	0	47	0	27	12	4	1	1	1	5	1	1	1	2	2	416	3	1.07	11	1	0	0	0	0	1	0	1	0	1	0	0.009014423	0.028245192	0.004807692		0	0.043478261	0
237	Moatize	TETE	5	6	4	1039	905	0	0	0	0	0	0	123	0	0	7	4	0	1	0	8	0	0	1	2	2	226.25	3	2.79	0	0	1	0	0	0	1	0	1	0	1	1		0.118383061			0	0.058823529	0
238	Moatize	TETE	5	3	2	3038	3038	16	1	0	0	0	0	1	0	106	42	12	1	1	0	12	2	0	3	5	3	253.166.666.666.667	3	1.07	14	0	0	0	1	0	0	1	1	0	1	0	0.007285974	0.000455373	0.000455373		0	0.068292683	1
239	Changara	TETE	5	6	4	244	219	0	0	0	0	0	0	19	0	0	5	0	0	1	0	1	0	0	1	0		0	1	2.79	0	0	1	0	0	0	0	0	0	0	1	1		0.077868852			0	0.285714286	0
240	Changara	TETE	5	6	4	198	198	0	0	0	0	0	0	0	0	0	4	0	0	0	0	0	0	0	1	0		0	1	2.79	0	0	1	0	0	0	0	0	0	0	1	1					0	1	0
241	Changara	TETE	5	7	4	286	276	0	18	0	0	0	0	0	0	0	1	1	0	1	0	1	0	0				276	3	2.79	0	0	1	0	0	0	0	0	1	0	1	1		0.006993007	0.062937063		0	0.666666667	0
242	Tsangano	TETE	5	7	4	57	56	0	0	0	0	0	0	0	0	0	0	0	0	0	0	0	0	0	1	0	0	0	1	2.79	0	0	1	0	0	0	0	0	0	0	1	1	0	0	0	0	0	1	0
243	Tsangano	TETE	5	7	4	265	263	0	0	0	0	0	0	1	0	0	3	1	0	1	0	1	0	0	2	3	3	263	3	2.79	0	0	1	1	0	0	0	1	1	0	1	1	0	0.003773585	0	0	0	0.666666667	0
244	Tsangano	TETE	5	6	4	313	308	0	0	0	0	0	0	6	0	0	2	0	0	0	0	0	0	0	1	0	1	0	1	2.79	0	0	1	0	0	0	0	0	0	0	1	1		0.019169329			0	0.666666667	0
245	Tsangano	TETE	5	5	4	446	429	0	0	0	0	0	0	9	0	0	5	2	0	1	0	2	0	0	2	3	1	214.5	3	1.07	0	0	1	1	0	0	0	0	1	0	1	0	0	0.020179372	0	0	0	0.058823529	0
246	Zumbu	TETE	5	6	4	120	119	0	0	0	0	0	0		0	0	3	1	0	1	0	1	0	0	2	4	1	119	3	2.79	0	0	1	1	0	0	0	0	1	0	1	1					0	0.285714286	0
247	Zumbu	TETE	5	6	4	22	22	0	0	0	0	0	0	0	0	0	3	1	0	1	0	1	0	0	2	3	0	22	3	2.79	0	0	1	1	0	0	0	0	1	0	1	1	0	0	0	0	0	0.666666667	0
248	Zumbu	TETE	5	5	4	228	222	0	0	0	0	0	0	0	0	0	3	1	0	1	0	1	0	0	2	4	1	222	3	1.07	0	0	1	1	0	0	0	0	1	0	1	0					0	0.055555556	0
250	Barue	MANICA	6	4	3	2990	1886	40	183	54	1	0	0	51	75	3	22	4	1	1	1	7	1	1	1	1	2	471.5	3	1.25	3	1	0	0	0	0	1	0	1	0	1	0	0.013377926	0.017056856	0.061204013	0.025083612	1	0.038461538	0
251	Barue	MANICA	6	8	4	409	405	6	24	0	0	0	0	6	0	0	2	1	0	1	0	1	0	0	1	0	0	405	3	2.76	0	0	1	0	0	0	0	0	1	0	1	1	0.014669927	0.014669927	0.058679707	0	1	0.666666667	0
252	Barue	MANICA	6	7	4	404	402	0	0	0	0	0	0	0	0	2	2		0								0			2.76	2	0	1	0	0	0	0	0	0	0	1	1	0	0	0	0	1		0
253	Gondola	MANICA	6	6	4	2460	2273	4	157	14	0	0	0	291	0	0	18	3	0	1	0	8	0	0	1	1	1	757.666.666.666.667	3	2.76	0	0	1	0	0	0	0	0	1	0	1	0	0.001626016	0.118292683	0.063821138	0	0	0.052631579	0
254	Gondola	MANICA	6	3	2	7297	5281	19	303	24	4	3	7	0	148	50	43	14	1	1	1	16	3	0	1	1	1	377.214.285.714.286	3	1.25	14	0	0	0	0	0	0	0	1	0	1	0	0.00260381	0	0.041523914	0.020282308	0	0.125	1
255	Gondola	MANICA	6	6	4	2707	2561	2	150	32	0	0	0	124	0	0	7	6	0	1	0	11	0	0	2	3	1	426.833.333.333.333	3	2.76	0	0	1	1	0	0	0	0	1	0	1	0	0.000738825	0.045807167	0.055411895	0	0	0.037037037	0
256	Gondola	MANICA	6	7	4	274	270	4	3	0	0	0	0	0	0	0	3	1	0	0	0	1	0	0	1	0	0	270	3	2.76	0	0	1	0	0	0	0	0	1	0	1	1	0.01459854	0	0.010948905	0	1	0.666666667	0
257	Gondola	MANICA	6	5	4	3245	2389	131	212	6	0	0	0	90	38	0	22	3	0	0	0	7	1	0	1	1	1	796.333.333.333.333	3	1.25	0	0	1	0	0	0	0	0	1	0	1	0	0.0403698	0.027734977	0.065331279	0.011710324	1	0.041666667	0
258	Gondola	MANICA	6	6	4	367	359	0	0	0	0	0	0	7	0	0	6	1	0	0	0	1	0	0	1	0	2	359	3	2.76	0	0	1	0	0	0	1	0	1	0	1	1	0	0.019073569	0	0	0	0.666666667	0
259	Gondola	MANICA	6	8	4	565	655	0	14	2	0	0	0	5	0	0	4	0	0	1	0	1	0	0	1	0	1	0	1	2.76	0	0	1	0	0	0	0	0	0	0	1	1	0	0.008849558	0.024778761	0	1	0.5	0
260	Gondola	MANICA	6	6	4	399	390	0	0	0	0	0	0	9	0	0	3	1	1	1	0	1	0	0	1	0	1	390	3	2.76	0	0	1	0	0	0	0	0	1	0	1	1	0	0.022556391	0	0	1	0.666666667	0
261	Guro	MANICA	6	6	4	144	89	0	0	0	0	0	0	0	0	0	2	0	0	1	0	0	0	0	2	3	1	0	1	2.76	0	0	1	1	0	0	0	0	0	0	1	1	0	0	0	0	0	1	0
262	Guro	MANICA	6	6	4	809	834	9	53	4	0	0	0	9	2	0	8	5	1	1	0	5	1	0	2	3	3	166.8	3	2.76	0	0	1	1	0	0	0	1	1	0	1	0	0.011124845	0.011124845	0.065512979	0.002472188	1	0.076923077	0
263	Machaze	MANICA	6	8	4	204	191	0	0	0	0	0	0	2	1	0	1	0	0	0	0	0	0	0	1	0	1	0	1	2.76	0	0	1	0	0	0	0	0	0	0	1	1	0	0.009803922	0	0.004901961	1	1	0
264	Machaze	MANICA	6	8	4	138	137	0	0	0	0	0	0	1	0	0	1	1	0	0	0	1	0	0	1	0	1	137	3	2.76	0	0	1	0	0	0	0	0	1	0	1	1	0	0.007246377	0	0	1	0.666666667	0
265	Machaze	MANICA	6	6	4	1140	958	18	48	24	0	0	0	71	29	0	8	4	0	0	0	6	1	0	2	4	2	239.5	3	2.76	0	0	1	1	0	0	1	0	1	0	1	0	0.015789474	0.062280702	0.042105263	0.025438596	1	0.076923077	0
266	Machaze	MANICA	6	8	4	82	79	0	0	0	0	0	0	2	0	0	1	1	0	0	0	1	0	0	1	0	1	79	3	2.76	0	0	1	0	0	0	0	0	1	0	1	1	0	0.024390244	0	0	1	1	0
267	Machaze	MANICA	6	7	4	64	41	0	0	0	0	0	0	1	0	0	1	0	0	0	0	0	0	0	1	0	1	0	1	2.76	0	0	1	0	0	0	0	0	0	0	1	1	0	0.015625	0	0	1	1	0
268	Macossa	MANICA	6	5	4	282	236	0	0	0	0	0	0	6	4	0	4	3	0	1	0	3	0	0	3	5	1	786.666.666.666.667	3	1.25	0	0	1	0	1	0	0	0	1	0	1	0	0	0.021276596	0	0.014184397	0	0.047619048	0
269	Manica	MANICA	6	8	4	69	63	0	0	0	0	0	0	1	0	0	3	0	0	0	0	0	0	0	1	0	1	0	1	2.76	0	0	1	0	0	0	0	0	0	0	1	1	0	0.014492754	0	0	0	1	0
270	Manica	MANICA	6	8	4	172	167	0	0	0	0	0	0	5	0	0	2	0	0	1	0	1	0	0	1	0	2	0	1	2.76	0	0	1	0	0	0	1	0	0	0	1	1	0	0.029069767	0	0	1	0.666666667	0
271	Manica	MANICA	6	8	4	95	87	0	0	0	0	0	0	1	0	0	3	0	0	0	0	0	0	0	1	0	1	0	1	2.76	0	0	1	0	0	0	0	0	0	0	1	1	0	0.010526316	0	0	1	1	0
272	Manica	MANICA	6	6	4	113	95	0	0	0	0	0	0	3	0	0	7	0	0	1	0	1	0	0	1	0	1	0	1	2.76	0	0	1	0	0	0	0	0	0	0	1	1	0	0.026548673	0	0	0	1	0
273	Manica	MANICA	6	5	4	2616	1929	0	1	0	1	0	0	75	76	5	24	5	1	1	0	9	2	0	1	1	1	385.8	3	1.25	5	0	1	0	0	0	0	0	1	0	1	0	0	0.028669725	0.000382263	0.029051988	1	0.06	0
275	Manica	MANICA	6	8	4	278	273	0	0	0	0	0	0	0	0	0	3	0	0	1	0	1	0	0	1	0	1	0	1	2.76	0	0	1	0	0	0	0	0	0	0	1	1	0	0	0	0	1	1	0
276	Manica	MANICA	6	8	4	165	0	0	0	0	0	0	0	0	0	0	3	0	0	0	0	0	0	0	1	0	0	0	1	2.76	0	0	1	0	0	0	0	0	0	0	1	1	0	0	0	0	1	1	0
277	Manica	MANICA	6	5	4	1167	1214	0	0	0	0	5	10	19	0	15	6	4	0	1	0	5	0	0	2	4	2	303.5	3	1.25	10	0	1	1	0	0	1	0	1	0	1	1	0	0.016281063	0	0	1	0.105263158	0
278	Mossurize	MANICA	6	6	4	337	302	0	0	0	0	0	0	17	0	0	2	1	0	1	0	1	0	0	2	4	1	302	3	2.76	0	0	1	1	0	0	0	0	1	0	1	1	0	0.050445104	0	0	1	0.5	0
279	Mossurize	MANICA	6	5	4	930	766	27	49	1	0	0	0	31	29	3	14	3	1	1	0	4	1	0	1	2	1	255.333.333.333.333	3	1.25	3	0	1	0	0	0	0	0	1	0	1	0	0.029032258	0.033333333	0.052688172	0.031182796	1	0.071428571	0
281	Mossurize	MANICA	6	6	4	246	238	0	0	0	0	0	0	0	0	0	3	1	0	1	0	1	0	0	2	4	0	238	3	2.76	0	0	1	1	0	0	0	0	1	0	1	1	0	0	0	0	1	0.666666667	0
282	Sussundenga	MANICA	6	7	4	484	426	2	28	0	0	0	0	17	0	2	4	1	0	1	0	1	0	0	1	0	1	426	3	2.76	2	0	1	0	0	0	0	0	1	0	1	0	0.004132231	0.035123967	0.05785124	0	1	0.25	0
283	Sussundenga	MANICA	6	8	4	194	184	0	0	0	0	0	0	2	0	0	3	1	0	1	0	1	0	0	1	0	2	184	3	2.76	0	0	1	0	0	0	1	0	1	0	1	1	0	0.010309278	0	0	0	0.666666667	0
284	Sussundenga	MANICA	6	5	4	1163	1021	0	0	0	0	0	0	35	57	0	8	6	1	1	0	6	1	0	4	6	1	170.166.666.666.667	3	1.25	0	0	1	0	0	1	0	0	1	0	1	0	0	0.030094583	0	0.049011178	1	0.066666667	0
286	Dondo	SOFALA	7	7	4	59	55	0	0	0	0	0	0	1	0	0	4	1	0	1	0	1	0	0				55	3	2.96	0	0	1	0	0	0	0	0	1	0	1	1	0	0.016949153	0	0	0	1	0
287	Dondo	SOFALA	7	1	1	9477	4590	110	7	13	1	0	1	0	1614	46	109	30	1	1	0	30	9	0	2	4	0	153	3	1	13	0	0	1	0	0	0	0	1	0	1	0	0.011607049	0	0.00073863	0.170307059	0	0.032335329	0
289	Buzi	SOFALA	7	4	3	1203	901	35	15	0	0	0	0	14	0	6	23	4	1	1	1	5	2	1	2	4	3	225.25	3	1	6	1	0	1	0	0	0	1	1	0	1	0	0.029093932	0.011637573	0.012468828	0	0	0.05	0
290	Buzi	SOFALA	7	7	4	362	329	0	0	0	0	0	0	14	0	0	3	1	0	1	0	1	0	0				329	3	2.96	0	0	1	0	0	0	0	0	1	0	1	1	0	0.038674033	0	0	1	0.666666667	0
292	Caia	SOFALA	7	5	4	1603	1461	12	0	0	0	0	0	29	17	0	9	5	0	1	0	5	1	0	2	4	2	292.2	3	1	0	0	1	1	0	0	1	0	1	0	1	0	0.007485964	0.018091079	0	0.010605115	0	0.043478261	0
293	Caia	SOFALA	7	7	4	164	170	0	0	0	0	0	0	0	0	0	1	0	0	0	0	0	0	0				0	1	2.96	0	0	1	0	0	0	0	0	0	0	1	1	0	0	0	0	0	1	0
294	Caia	SOFALA	7	6	4	610	605	0	0	0	0	0	0	10	0	0	7	1	0	1	0	1	0	0				605	3	2.96	0	0	1	0	0	0	0	0	1	0	1	0	0	0.016393443	0	0	0	0.142857143	0
295	Caia	SOFALA	7	7	4	131	128	0	0	0	0	0	0	0	0	0	4		0						2	3				2.96	0	0	1	1	0	0	0	0	0	0	1	1	0	0	0	0	1		0
296	Chemba	SOFALA	7	5	4	513	457	6	2	0	0	0	0	18	0	0	6	2	0	1	0	2	0	0	3	5	2	228.5	3	1	0	0	1	0	1	0	1	0	1	0	1	0	0.011695906	0.035087719	0.003898635	0	1	0.045454545	0
297	Chemba	SOFALA	7	7	4	119	100	0	0	0	0	0	0	8	0	0	3	1	0	1	0	1	0	0				100	3	2.96	0	0	1	0	0	0	0	0	1	0	1	1	0	0.067226891	0	0	0	0.666666667	0
298	Cheringoma	SOFALA	7	7	4	0	0	0	0	0	0	0	0	0	0	0	3	0	0	0	0	0	0	0				0	1	2.96	0	0	1	0	0	0	0	0	0	0	1	1					0	1	0
299	Cheringoma	SOFALA	7	5	4	822	779	0	0	0	0	0	0	14	1	0	7	5	0	1	0	5	0	0				155.8	3	1	0	0	1	0	0	0	0	0	1	0	1	0	0	0.01703163	0	0.001216545	0	0.03030303	0
300	Chibabava	SOFALA	7	5	4	260	222	0	0	0	0	0	0	13	0	0	5	3	0	1	0	3	0	0	2	4	2	74	3	1	0	0	1	1	0	0	1	0	1	0	1	0	0	0.05	0	0	1	0.05	0
301	Chibabava	SOFALA	7	7	4	83	83	0	0	0	0	0	0	0	0	0	3	0	0	1	0	1	0	0				0	1	2.96	0	0	1	0	0	0	0	0	0	0	1	1	0	0	0	0	0	1	0
302	Chibabava	SOFALA	7	7	4	153	142	0	0	0	0	0	0	10	0	0	2	0	0	0	0	1	0	0				0	1	2.96	0	0	1	0	0	0	0	0	0	0	1	1	0	0.065359477	0	0	0	1	0
303	Chibabava	SOFALA	7	7	4	262	181	0	0	0	0	0	0	14	0	0	8	2	0	1	0	2	0	0				90.5	3	2.96	0	0	1	0	0	0	0	0	1	0	1	1	0	0.053435115	0	0	0	0.2	0
304	Chibabava	SOFALA	7	6	4	67	62	0	0	0	0	0	0	20	0	0	2	0	0	0	0	0	0	0				0	1	2.96	0	0	1	0	0	0	0	0	0	0	1	1	0	0.298507463	0	0	0	1	0
305	Chibabava	SOFALA	7	4	3	725	483	25	0	0	0	0	0	35	0	14	29	3	1	1	1	3	1	1	2	4	3	161	3	2.96	10	1	0	1	0	0	0	1	1	0	1	0	0.034482759	0.048275862	0	0	1	0.034482759	0
306	Chibabava	SOFALA	7	7	4	112	92	0	1	2	0	0	0	12	0	0	3	1	0	1	0	1	0	0				92	3	1	0	0	1	0	0	0	0	0	1	0	1	1	0	0.107142857	0.008928571	0	1	1	0
307	Chibabava	SOFALA	7	7	4	37	35	0	0	0	0	0	0	0	0	0	1		0											2.96	0	0	1	0	0	0	0	0	0	0	1	1	0	0	0	0	0		0
308	Dondo	SOFALA	7	7	4	135	110	0	0	0	0	0	0	3	0	0	3	0	0	0	0	0	0	0				0	1	2.96	0	0	1	0	0	0	0	0	0	0	1	1	0	0.022222222	0	0	0	1	0
309	Dondo	SOFALA	7	5	4	1467	2173	49	5	0	0	0	0	159		4	28	5	1	1	0	6	1	0	2	4	2	434.6	3	1	4	0	1	1	0	0	1	0	1	0	1	0	0.0334015	0.108384458	0.003408316		1	0.050632911	0
310	Dondo	SOFALA	7	5	4	1375	1150	0	0	0	0	0	0	65	0	1	12	4	1	1	0	5	1	0				287.5	3	1	1	0	1	0	0	0	0	0	1	0	1	1	0	0.047272727	0	0	0	0.088235294	0
311	Dondo	SOFALA	7	6	4	20	14	0	0	0	0	0	0	0	0	0	3	0	0	0	0	1	0	0				0	1	2.96	0	0	1	0	0	0	0	0	0	0	1	1	0	0	0	0	0	0.5	0
312	Dondo	SOFALA	7	7	4	257	197	0	0	0	0	0	0	18	0	0	3	0	0	0	0	1	0	0				0	1	2.96	0	0	1	0	0	0	0	0	0	0	1	1	0	0.070038911	0	0	0	0.666666667	0
313	Gorongosa	SOFALA	7	7	4	93	92	0	0	0	0	0	0	0	0	0	3	0	0	0	0	0	0	0				0	1	2.96	0	0	1	0	0	0	0	0	0	0	1	1	0	0	0	0	0	1	0
314	Gorongosa	SOFALA	7	5	4	1757	1597	12	0	0	0	0	0	23	0	0	10	4	1	1	0	5	1	0	2	3	2	399.25	3	1	0	0	1	1	0	0	1	0	1	0	1	0	0.006829824	0.013090495	0	0	1	0.051282051	0
315	Gorongosa	SOFALA	7	7	4	206	191	0	0	1	0	0	0	9	0	0	3	1	0	0	0	1	0	0				191	3	2.96	0	0	1	0	0	0	0	0	1	0	1	1	0	0.04368932	0	0	1	0.666666667	0
316	Machanga	SOFALA	7	7	4	222	211	0	0	0	0	0	0	8	0	10	3	0	0	0	0	1	0	0				0	1	2.96	10	0	1	0	0	0	0	0	0	0	1	1	0	0.036036036	0	0	1	0.666666667	0
318	Machanga	SOFALA	7	5	4	467	474	0	0	0	0	0	0	15	0	0	9	3	0	1	0	5	0	0	2	3	2	158	3	1	0	0	1	1	0	0	1	0	1	0	1	0	0	0.032119914	0	0	1	0.033333333	0
319	Maringue	SOFALA	7	7	4	323	276	0	0	0	0	0	0	9	0	0	2	1	0	1	0	1	0	0				276	3	2.96	0	0	1	0	0	0	0	0	1	0	1	1	0	0.027863777	0	0	0	0.666666667	0
320	Maringue	SOFALA	7	5	4	927	840	18	1	0	0	0	0	28	0	0	5	2	0	1	0	2	0	0	3	5	3	420	3	1	0	0	1	0	1	0	0	1	1	0	1	0	0.019417476	0.030204962	0.001078749	0	1	0.041666667	0
321	Marromeu	SOFALA	7	4	3	1921	1840	1	2	0	0	0	0	5	0	8	19	4	1	1	1	5	1	1	3	5	2	460	3	1	8	1	0	0	1	0	1	0	1	0	1	0	0.000520562	0.002602811	0.001041124		1	0.025641026	0
322	Muanza	SOFALA	7	7	4	48	48	0	0	0	0	0	0	0	0	0	3	1	0	1	0	1	0	0				48	3	2.96	0	0	1	0	0	0	0	0	1	0	1	1	0	0	0	0	0	1	0
323	Muanza	SOFALA	7	6	4	332	298	1	0	0	0	0	0	12	0	15	7	2	0	1	0	3	0	0	1	0	2	149	3	2.96	10	0	1	0	0	0	1	0	1	0	1	0	0.003012048	0.036144578	0	0	1	0.052631579	0
324	Nhamatanda	SOFALA	7	6	4	975	1000	0	28	0	0	0	0	7	0	0	5	1	0	1	0	1	0	0				1000	3	2.96	0	0	1	0	0	0	0	0	1	0	1	1	0	0.007179487	0.028717949	0	0	0.4	0
326	Nhamatanda	SOFALA	7	4	3	2890	2132	92	9	0	2	6	0	2	216	13	25	7	1	1	1	9	2	1	2	4	2	304.571.428.571.429	3	1	10	1	0	1	0	0	1	0	1	0	1	0	0.03183391	0.000692042	0.003114187	0.074740484	1	0.032258065	0
327	Nhamatanda	SOFALA	7	6	4	584	575	0	0	0	0	0	0	9	0	0	3	0	0	0	0	1	0	0				0	1	2.96	0	0	1	0	0	0	0	0	0	0	1	1	0	0.015410959	0	0	0	0.666666667	0
328	Funhalouro	INHAMBANE	8	5	4	280	268	0	0	0	0	0	0	11	8	0	3	1	0	1	0	5	0	0	4	6	2	268	3	1.06	0	0	1	0	0	1	1	0	1	0	0	0	0	0.039285714	0	0.028571429	0	0.041666667	0
329	Govuro	INHAMBANE	8	5	4	579	456	34	66	3	1	0	0	24	7	3	6	2	1	1	0	6	1	0	1	2	3	228	3	1.06	3	0	1	0	0	0	0	1	1	0	0	0	0.058721934	0.041450777	0.113989637	0.01208981	0	0.074074074	0
330	Govuro	INHAMBANE	8	8	4	36	34	0	0	0	0	0	0	0	0	0	1	0	0	1	0	1	0	0	1	0	2	0	1	2.47	0	0	1	0	0	0	1	0	0	0	0	1	0	0	0	0	0	1	0
331	Govuro	INHAMBANE	8	6	4	176	163	0	0	0	0	0	0	0	2	0	4	1	0	1	0	1	0	0	2	4	1	163	3	2.47	0	0	1	1	0	0	0	0	1	0	0	0	0	0	0	0.011363636	0	0.333333333	0
332	Homoine	INHAMBANE	8	8	4	134	128	0	0	0	0	0	0	6	0	0	5	1	0	1	0	1	0	0	1	0	3	128	3	2.47	0	0	1	0	0	0	0	1	1	0	0	1	0	0.044776119	0	0	0	1	0
333	Homoine	INHAMBANE	8	5	4	1409	908	102	1	22	0	0	0	89	0	0	12	1	0	1	0	5	0	0	3	5	2	908	3	1.06	0	0	1	0	1	0	1	0	1	0	0	1	0.072391767	0.063165366	0.000709723	0	1	0.041666667	0
334	Homoine	INHAMBANE	8	6	4	168	168	0	0	0	0	0	0	1	0	0	5		0						1	0	2			2.47	0	0	1	0	0	0	1	0	0	0	0	1	0	0.005952381	0	0	0		0
335	Homoine	INHAMBANE	8	8	4	154	154	0	0	0	0	0	0	0	0	0	4	0	0	0	0	1	0	0	1	0	1	0	1	2.47	0	0	1	0	0	0	0	0	0	0	0	1	0	0	0	0	0	0.666666667	0
336	Homoine	INHAMBANE	8	7	4	91	91	0	0	0	0	0	0			0	3	0	0	1	0	1	0	0	1	0	1	0	1	2.47	0	0	1	0	0	0	0	0	0	0	0	1					0	1	0
337	Jangamo	INHAMBANE	8	6	4	233	212	0	0	0	0	0	0	10	0	0	4	0	0	1	0	2	0	0	1	0	1	0	1	2.47	0	0	1	0	0	0	0	0	0	0	0	1	0	0.042918455	0	0	1	0.666666667	0
338	Jangamo	INHAMBANE	8	3	2	2623	2249	4	34	0	0	0	5	2	322	18	45	10	1	1	1	13	2	1	3	5	2	224.9	3	1.06	10	0	0	0	1	0	1	0	1	0	0	0	0.001524971	0.000762486	0.012962257	0.122760198	0	0.04526749	1
339	Jangamo	INHAMBANE	8	8	4													0	0	1	0	2	0	0	1	0	1	0	1	2.47		0	1	0	0	0	0	0	0	0	0	1					0	0.666666667	0
340	Jangamo	INHAMBANE	8	7	4	126	123	0	0	0	0	0	0	3	0	0	4	0	0	1	0	3	0	0	1	0	2	0	1	2.47	0	0	1	0	0	0	1	0	0	0	0	1	0	0.023809524	0	0	0	0.4	0
341	Inharrime	INHAMBANE	8	6	4	169	165	0	0	0	0	3	0	17	0	3	3	1	0	1	0	1	0	0	1	0	2	165	3	2.47	3	0	1	0	0	0	1	0	1	0	0	1	0	0.100591716	0	0	0	0.666666667	0
342	Inharrime	INHAMBANE	8	8	4	43	43	0	0	0	0	0	0	3	0	0	3	0	0	1	0	1	0	0	1	0	1	0	1	2.47	0	0	1	0	0	0	0	0	0	0	0	1	0	0.069767442	0	0	0	1	0
343	Inharrime	INHAMBANE	8	5	4	1346	985	122	24	0	0	0	0	167	33	4	13	4	1	1	0	7	1	0	3	5	2	246.25	3	1.06	4	0	1	0	1	0	1	0	1	0	0	0	0.09063893	0.124071322	0.017830609	0.024517088	1	0.051282051	0
344	Inharrime	INHAMBANE	8	6	4	184	171	2	0	0	0	0	0	5	1	0	5	1	0	1	0	2	0	0	1	0	0	171	3	2.47	0	0	1	0	0	0	0	0	1	0	0	1	0.010869565	0.027173913	0	0.005434783	0	0.5	0
346	Inhassoro	INHAMBANE	8	5	4	686	588	23	0	0	0	0	0	27	13	0	6	5	1	1	0	8	1	0	3	5	1	117.6	3	1.06	0	0	1	0	1	0	0	0	1	0	0	0	0.033527697	0.039358601	0	0.018950437	0	0.074074074	0
347	Inhassoro	INHAMBANE	8	6	4	72	92	0	0	0	0	0	0	3	0	0	2	0	0	1	0	1	0	0	1	0		0	1	2.47	0	0	1	0	0	0	0	0	0	0	0	1	0	0.041666667	0	0	0	1	0
348	Inhassoro	INHAMBANE	8	5	4	385	346	44	1	0	0	0	1	12	0	9	7		0						4	6	2			1.06	9	0	1	0	0	1	1	0	0	0	0	1	0.114285714	0.031168831	0.002597403	0	0		0
349	Jangamo	INHAMBANE	8	5	4	601	395	0	0	0	0	0	1	46	23	3	6	5	0	1	0	14	0	0	2	3	3	79	3	1.06	3	0	1	1	0	0	0	1	1	0	0	0	0	0.076539101	0	0.038269551	1	0.027027027	0
350	Mabote	INHAMBANE	8	5	4	616	497	13	86	0	0	0	0	18	10	1	8	5	0	1	0	7	0	0	2	4	3	99.4	3	1.06	1	0	1	1	0	0	0	1	1	0	0	0	0.021103896	0.029220779	0.13961039	0.016233766	1	0.04	0
351	Mabote	INHAMBANE	8	6	4	100	107	0	0	0	0	0	0	0	0	0	4	0	0	0	0	1	0	0	1	0	1	0	1	2.47	0	0	1	0	0	0	0	0	0	0	0	1	0	0	0	0	0	1	0
352	Massinga	INHAMBANE	8	6	4	44	44	0	0	0	0	0	0	0	0	0	3	0	0	0	0	1	0	0	1	0	0	0	1	2.47	0	0	1	0	0	0	0	0	0	0	0	1	0	0	0	0	0	1	0
353	Massinga	INHAMBANE	8	8	4	312	302	0	0	0	0	0	0	3	0	9	3	0	0	1	0	1	0	0	1	2	0	0	1	2.47	9	0	1	0	0	0	0	0	0	0	0	1	0	0.009615385	0	0	0	1	0
354	Massinga	INHAMBANE	8	5	4	260	248	0	0	0	0	0	0	7	0	7	8	0	0	1	0	1	0	0	2	3	2	0	1	1.06	7	0	1	1	0	0	1	0	0	0	0	1	0	0.026923077	0	0	0	1	0
355	Massinga	INHAMBANE	8	6	4	284	278	0	0	0	0	0	0	0	1	0	4	0	0	0	0	1	0	0	1	0	1	0	1	2.47	0	0	1	0	0	0	0	0	0	0	0	1	0	0	0	0.003521127	0	1	0
356	Massinga	INHAMBANE	8	5	4	1702	1408	0	2	0	0	1	0	238	118	2	22	3	1	1	0	9	2	0	1	1	2	469.333.333.333.333	3	1.06	2	0	1	0	0	0	1	0	1	0	0	0	0	0.139835488	0.001175088	0.0693302	1	0.037974684	0
357	Massinga	INHAMBANE	8	7	4	249	248	0	0	0	0	0	0	4	0	0	3	0	0	0	0	1	0	0	1	0	2	0	1	2.47	0	0	1	0	0	0	1	0	0	0	0	1	0	0.016064257	0	0	1	1	0
358	Massinga	INHAMBANE	8	6	4	195	195	0	0	0	0	0	0	0	0	0	3	0	0	0	0	1	0	0	1	0	2	0	1	2.47	0	0	1	0	0	0	1	0	0	0	0	1					0	1	0
359	Homoine	INHAMBANE	8	6	4	136	125	0	0	0	0	0	0	9	0	0	3	0	0	0	0	1	0	0	1	0	1	0	1	2.47	0	0	1	0	0	0	0	0	0	0	0	1	0	0.066176471	0	0	0	0.666666667	0
360	Homoine	INHAMBANE	8	4	3	2439	2305	55	12	13	3	11	116	0	0	147	35	11	1	1	1	12	1	1	4	6	2	209.545.454.545.455	3	1.06	14	1	0	0	0	1	1	0	1	0	0	1	0.022550226	0	0.004920049	0	1	0.018518519	0
361	Morrumbene	INHAMBANE	8	6	4	153	144	0	0	0	0	0	0	0	0	0	3	1	0	1	0	1	0	0	1	0	1	144	3	2.47	0	0	1	0	0	0	0	0	1	0	0	1	0	0	0	0	0	1	0
362	Morrumbene	INHAMBANE	8	5	4	1596	749	0	0	0	0	0	0	183	18	0	17	4	0	1	0	8	0	0	1	2	3	187.25	3	1.06	0	0	1	0	0	0	0	1	1	0	0	0	0	0.114661654	0	0.011278195	1	0.027027027	0
363	Panda	INHAMBANE	8	6	4	208	182	0	0	0	0	0	0	2	0	0	6	1	0	1	0	3	0	0	2	4	1	182	3	2.47	0	0	1	1	0	0	0	0	1	0	0	1	0	0.009615385	0	0	0	0.4	0
364	Panda	INHAMBANE	8	7	4	62	60	0	0	0	0	0	0	1	0	0	3	0	0	1	0	1	0	0	1	0	2	0	1	2.47	0	0	1	0	0	0	1	0	0	0	0	1	0	0.016129032	0	0	0	0.666666667	0
365	Panda	INHAMBANE	8	6	4	123	120	0	0	0	0	0	0	4	0	0	5	1	0	1	0	2	0	0	1	0	2	120	3	2.47	0	0	1	0	0	0	1	0	1	0	0	1	0	0.032520325	0	0	0	0.4	0
366	Panda	INHAMBANE	8	5	4	524	455	4	1	14	0	15	0	21	0	15	10	3	0	1	0	7	0	0	3	5	2	151.666.666.666.667	3	1.06	10	0	1	0	1	0	1	0	1	0	0	0	0.007633588	0.040076336	0.001908397	0	1	0.033333333	0
367	Vilanculos	INHAMBANE	8	6	4	91	91	0	0	0	0	0	0	3	0	0	4	0	0	0	0	1	0	0	1	0	2	0	1	2.47	0	0	1	0	0	0	1	0	0	0	0	1	0	0.032967033	0	0	0	1	0
368	Vilanculos	INHAMBANE	8	6	4	127	126	0	0	0	0	0	0	0	0	0	3	0	0	0	0	1	0	0	1	0	1	0	1	2.47	0	0	1	0	0	0	0	0	0	0	0	1	0	0	0	0	0	1	0
369	Vilanculos	INHAMBANE	8	4	3	1985	1729	0	0	0	0	0	0	13	71	3	26	2	1	1	1	6	1	2	2	3	0	864.5	3	1.06	3	1	0	1	0	0	0	0	1	0	0	0	0	0.006549118	0	0.035768262	0	0.051724138	0
370	Zavala	INHAMBANE	8	6	4	289	272	0	0	0	0	0	0	0	0	0	3	1	0	1	0	1	0	0	1	0	3	272	3	2.47	0	0	1	0	0	0	0	1	1	0	0	1	0	0	0	0	0	1	0
371	Zavala	INHAMBANE	8	6	4	153	149	0	0	0	0	0	0	4	0	0	6	0	0	1	0	1	0	0	1	0	0	0	1	2.47	0	0	1	0	0	0	0	0	0	0	0	1	0	0.026143791	0	0	0	1	0
372	Zavala	INHAMBANE	8	8	4	279	250	0	0	0	0	4	0	0	0	5	3	1	0	1	0	1	0	0	1	0	1	250	3	2.47	5	0	1	0	0	0	0	0	1	0	0	1	0	0	0	0	0	0.5	0
373	Zavala	INHAMBANE	8	5	4	1319	936	7	0	0	0	7	19	0	0	33	10	3	1	1	0	8	1	0	1	2	1	312	3	1.06	12	0	1	0	0	0	0	0	1	0	0	0	0.005307051	0	0	0	1	0.048780488	0
374	Zavala	INHAMBANE	8	6	4	536	510	0	2	0	0	0	0	3	0	0	10	1	0	1	0	1	0	0	1	0	1	510	3	2.47	0	0	1	0	0	0	0	0	1	0	0	1	0	0.005597015	0.003731343	0	0	0.333333333	0
375	Bilene	GAZA	9	7	4	174	494	11	96	5	0	0	0	0	63	0	4	1	0	1	0	1	0	0	2	4		494	3	2.5	0	0	1	1	0	0	0	0	1	0	0	1	0.063218391	0	0.551724138	0.362068966	1	0.666666667	0
376	Bilene	GAZA	9	5	4	2153	1558	154	124	19	2	0	1	71	12	4	16	6	1	1	0	6	1	0	2	4	1	259.666.666.666.667	3	1.17	4	0	1	1	0	0	0	0	1	0	0	0	0.0715281	0.032977241	0.057594055	0.005573618	1	0.035087719	0
377	Bilene	GAZA	9	7	4	495	496	0	0	0	0	0	0	10	0	1	4	0	0	1	0	1	0	0	1	0	2	0	1	2.5	1	0	1	0	0	0	1	0	0	0	0	1	0	0.02020202	0	0	0	0.4	0
378	Bilene	GAZA		8	4												4	0	0	0	0	0	0	0	1	0		0	1	2.5		0	1	0	0	0	0	0	0	0	0	1					1	1	0
379	Chibuto	GAZA	9	7	4	213	202	0	0	0	0	0	0	1	0	0	6	1	0	1	0	1	0	0	1	0	2	202	3	2.5	0	0	1	0	0	0	1	0	1	0	0	1	0	0.004694836	0	0	0	0.666666667	0
380	Chibuto	GAZA	9	4	3	352	2565	73	134	30	2	2	3	94	55	8	45	6	1	1	1	9	1	1	3	5	1	427.5	3	1.17	8	1	0	0	1	0	0	0	1	0	0	0	0.207386364	0.267045455	0.380681818	0.15625	1	0.045454545	0
381	Chibuto	GAZA	9	7	4	39	39	0	0	0	0	0	0	0	14	0	3	0	0	0	0	0	0	0	1	0	0	0	1	2.5	0	0	1	0	0	0	0	0	0	0	0	1	0	0	0	0.358974359	0	1	0
382	Chibuto	GAZA	9	7	4	137	121	0	0	0	0	0	0	18	0	0	4	1	0	1	0	1	0	0	1	0	2	121	3	2.5	0	0	1	0	0	0	1	0	1	0	0	1	0	0.131386861	0	0	0	1	0
383	Chibuto	GAZA	9	7	4	528	505	43	9	0	0	0	4	5	0	21	8	1	0	1	0	2	0	0	2	4	1	505	3	2.5	11	0	1	1	0	0	0	0	1	0	0	1	0.081439394	0.009469697	0.017045455	0	0	0.25	0
384	Chicualacuala	GAZA	9	4	3	466	1108	8	6	5	0	0	0	17	16	1	6	3	1	1	0	3	1	0	3	5	1	369.333.333.333.333	3	1.17	1	1	0	0	1	0	0	0	1	0	0	0	0.017167382	0.036480687	0.012875536	0.034334764	1	0.090909091	0
385	Chicualacuala	GAZA	9	8	4	19	19	0	0	0	0	0	0	0	0	0	1	0	0	0	0	0	0	0	1	0		0	1	2.5	0	0	1	0	0	0	0	0	0	0	0	1	0	0	0	0	0	1	0
386	Chicualacuala	GAZA	9	7	4	217	374	8	20	5	0	0	0	12	6	0	3	1	0	1	0	1	0	0	1	0	1	374	3	2.5	0	0	1	0	0	0	0	0	1	0	0	1	0.036866359	0.055299539	0.092165899	0.02764977	1	0.5	0
388	Chokwe	GAZA	9	5	4	716	666	3	20	2	0	0	0	14	0	0	10	1	1	1	0	2	1	0	2	4	2	666	3	1.17	0	0	1	1	0	0	1	0	1	0	0	1	0.004189944	0.019553073	0.027932961	0	0	0.034883721	0
389	Chokwe	GAZA	9	4	3	3552	2382	187	29	101	3	3	5	285	4	19	31	6	1	1	1	6	1	0	2	3	2	397	3	1.17	10	1	0	1	0	0	1	0	1	0	0	0	0.052646396	0.080236486	0.008164414	0.001126126	1	0.066666667	0
390	Guija	GAZA	9	7	4	496	438	0	0	9	0	0	0	47	0	0	12	0	0	1	0	1	0	0	1	0	1	0	1	2.5	0	0	1	0	0	0	0	0	0	0	0	1	0	0.094758065	0	0	0	0.5	0
392	Guija	GAZA	9	5	4	661	590	14	29	1	1	1	5	12	57	28	12	4	0	1	0	4	0	0	3	5	2	147.5	3	1.17	11	0	1	0	1	0	1	0	1	0	0	0	0.02118003	0.018154312	0.04387292	0.08623298	1	0.03125	0
393	Guija	GAZA	9	7	4	221	204	0	2	0	0	0	1	0	3	11	8	1	0	1	0	1	0	0	1	0	0	204	3	2.5	10	0	1	0	0	0	0	0	1	0	0	1	0	0	0.009049774	0.013574661	0	0.666666667	0
394	Mabalane	GAZA	9	5	4	560	470	10	5	5	0	0	0	17	17	0	8	4	1	1	0	4	1	0	4	6	3	117.5	3	1.17	0	0	1	0	0	1	0	1	1	0	0	0	0.017857143	0.030357143	0.008928571	0.030357143	0	0.117647059	0
395	Mandlakazi	GAZA	9	7	4	72	72	1	2	0	0	14	0	0	0	16	3	0	0	0	0	0	0	0	1	0	0	0	1	2.5	10	0	1	0	0	0	0	0	0	0	0	1	0.013888889	0	0.027777778	0	0	1	0
396	Mandlakazi	GAZA	9	7	4	217	217	11	0	0	0	0	0	13	0	0	2	1	0	1	0	1	0	0	2	4	0	217	3	2.5	0	0	1	1	0	0	0	0	1	0	0	1	0.080291971	0.094890511	0	0	1	1	0
397	Mandlakazi	GAZA	9	7	4	190	190	3	20	2	0	0	0	14	0	0	10	1	0	1	0	1	0	0	1	0	1	190	3	2.5	0	0	1	0	0	0	0	0	1	0	0	1	0.1875	0.875	1.25	0	0	1	0
398	Mandlakazi	GAZA	9	7	4	187	187	0	0	0	0	0	0	0	0	0	0	1	0	1	0	1	0	0	1	2	1	187	3	2.5	0	0	1	0	0	0	0	0	1	0	0	1	0	0	0	0	0	0.666666667	0
399	Mandlakazi	GAZA	9	7	4	388	360	5	3	5	0	0	0	21	0	0	4	1	0	1	0	1	0	0	1	0	1	360	3	2.5	0	0	1	0	0	0	0	0	1	0	0	1	0.012886598	0.054123711	0.007731959	0	0	0.666666667	0
400	Mandlakazi	GAZA	9	7	4	215	201	0	9	14	4	0	0	0	7	4	4	1	0	1	0	1	0	0	1	0	1	201	3	2.5	4	0	1	0	0	0	0	0	1	0	0	1	0	0	0.041860465	0.03255814	0	0.666666667	0
401	Mandlakazi	GAZA	9	2	2	2228	1372	41	0	2	0	24	23	13	11	86	25	7	0	1	1	11	0	0	4	6	2	196	3	1.17	14	0	0	0	0	1	1	0	1	0	0	0	0.018402154	0.005834829	0	0.004937163	1	0.035714286	1
402	Mandlakazi	GAZA	9	8	4	167	167	0	0	0	0	0	0	0	0	2	2	0	0	0	0	0	0	0	1	0	0	0	1	2.5	2	0	1	0	0	0	0	0	0	0	0	1	0	0	0	0	0	1	0
403	Mandlakazi	GAZA	9	7	4	65	58	11	1	0	0	0	1	0	0	1	3	0	0	0	0	0	0	0	1	0	1	0	1	2.5	1	0	1	0	0	0	0	0	0	0	0	1	0.169230769	0	0.015384615	0	1	1	0
404	Mandlakazi	GAZA	9	7	4	345	345	0	3	4	2	0	0	9	0	2	10	1	0	1	0	1	0	0	1	2	1	345	3	2.5	2	0	1	0	0	0	0	0	1	0	0	1	0	0.026086957	0.008695652	0	0	0.5	0
405	Massangena	GAZA	9	5	4	601	464	30	19	18	1	1	0	15	0	2	6	3	0	1	0	3	0	0	4	6	2	154.666.666.666.667	3	1.17	2	0	1	0	0	1	1	0	1	0	0	0	0.049916805	0.024958403	0.031613977	0	1	0.055555556	0
406	Massingir	GAZA	9	5	4	526	425	18	31	0	0	2	8	1	0	25	7	3	0	1	0	4	1	0	3	5	3	141.666.666.666.667	3	1.17	11	0	1	0	1	0	0	1	1	0	0	0	0.034220532	0.001901141	0.058935361	0	0	0.08	0
407	Xai-Xai	GAZA	9	3	2	3873	3310	215	368	80	98	25	38	10	0	174	44	12	1	1	1	12	2	1	4	6	2	275.833.333.333.333	3	1.17	14	0	0	0	0	1	1	0	1	0	0	0	0.055512523	0.002581978	0.095016783	0	0	0.036290323	1
408	Xai-Xai	GAZA	9	8	4	208	208	0	0	0	0	0	0	0	3	0	3	1	0	1	0	1	0	0	2	4	0	208	3	2.5	0	0	1	1	0	0	0	0	1	0	0	1	0	0	0	0.125	1	0.666666667	0
409	Xai-Xai	GAZA	9	4	3	1853	1108	246	194	55	1	0	0	79	20	2	29	3	1	1	0	5	2	0	2	3	2	369.333.333.333.333	3	1.17	2	1	0	1	0	0	1	0	1	0	0	0	0.13275769	0.042633567	0.104695089	0.010793308	1	0.068181818	0
410	Xai-Xai	GAZA	9	7	4	736	439	0	0	0	0	0	0	7	1	0	9	1	0	1	0	2	0	0	2	4	1	439	3	2.5	0	0	1	1	0	0	0	0	1	0	0	1	0	0.00951087	0	0.001358696	1	0.5	0
411	Xai-Xai	GAZA	9	7	4	507	479	0	12	31	4	0	0	29	0	4	10	1	0	1	0	2	0	0	2	3	1	479	3	2.5	4	0	1	1	0	0	0	0	1	0	0	1	0	0.057199211	0.023668639	0	1	0.4	0
412	Xai-Xai	GAZA	9	6	4	337	269	3	0	0	0	0	0	13	0	0	15	1	0	1	0	2	0	0	2	4	1	269	3	2.5	0	0	1	1	0	0	0	0	1	0	0	1	0.008902077	0.038575668	0	0	1	0.153846154	0
413	Xai-Xai	GAZA	9	8	4	260	429	20	0	0	0	0	0	0	20	0	5	0	0	1	0	1	0	0	2	3	0	0	1	2.5	0	0	1	1	0	0	0	0	0	0	0	1	0.076923077	0	0	0.076923077	1	0.666666667	0
414	Xai-Xai	GAZA	9	7	4	181	181	0	0	0	0	0	0	0	0	0	6	1	0	1	0	1	0	0	1	0	2	181	3	2.5	0	0	1	0	0	0	1	0	1	0	0	1	0	0	0	0	0	0.666666667	0
415	Boane	MAPUTO PROVINCIA	10	5	4	1406	1115	0	0	0	0	0	0	0	111	1	14	2	1	1	0	4	1	0	2	4	1	557.5	3	1.5	1	0	1	1	0	0	0	0	1	0	0	0	0	0	0	0.078947368	0	0.054054054	0
416	Boane	MAPUTO PROVINCIA	10	7	4	641	453	0	0	0	0	0	0	0	0	0	7	1	0	1	0	2	0	0	2	3	2	453	3	2.18	0	0	1	1	0	0	1	0	1	0	0	1	0	0	0	0	0	0.25	0
417	Boane	MAPUTO PROVINCIA	10	8	4	126	121	0	0	0	0	0	0	0	0	0	4	0	0	1	0	1	0	0	1	0	1	0	1	2.18	0	0	1	0	0	0	0	0	0	0	0	1		0	0	0	0	0.5	0
418	Magude	MAPUTO PROVINCIA	10	5	4	1091	821	14	0	0	0	0	0	61	0	1	12	5	1	1	0	6	1	0	3	5	3	164.2	3	1.5	1	0	1	0	1	0	0	1	1	0	0	0	0.012832264	0.055912007	0	0	0	0.037037037	0
419	Magude	MAPUTO PROVINCIA	10	6	4	40	40	0	0	0	0	0	0	0	0	0	3	1	0	1	0	1	0	0	1	0	2	40	3	2.18	0	0	1	0	0	0	1	0	1	0	0	1	0	0	0	0	0	0.666666667	0
420	Magude	MAPUTO PROVINCIA	10	6	4	61	61	0	0	0	0	0	0	0	0	0	3	0	0	1	0	1	0	0	1	0		0	1	2.18	0	0	1	0	0	0	0	0	0	0	0	1	0	0	0	0	1	1	0
421	Manhica	MAPUTO PROVINCIA	10	8	4	153	158	0	0	0	0	0	0	1	0	0	6	0	0	1	0	1	0	0	1	0	3	0	1	2.18	0	0	1	0	0	0	0	1	0	0	0	1	0	0.006535948	0	0	0	0.666666667	0
422	Manhica	MAPUTO PROVINCIA	10	7	4	193	137	0	0	0	0	0	8	0	0	8	8	0	0	1	0	1	0	0	1	0	2	0	1	2.18	8	0	1	0	0	0	1	0	0	0	0	1	0	0	0	0	0	0.666666667	0
423	Manhica	MAPUTO PROVINCIA	10	5	4	2129	1487	96	4	22	1	1	0	0	93	5	24	5	1	1	1	7	1	1	4	6	3	297.4	3	1.5	5	0	1	0	0	1	0	1	1	0	0	0	0.045091592	0	0.001878816	0.04368248	1	0.028571429	0
424	Manhica	MAPUTO PROVINCIA	10	7	4	207	174	0	0	0	0	0	8	0	0	8	6	0	0	0	0	0	0	0	1	0	2	0	1	2.18	8	0	1	0	0	0	1	0	0	0	0	1	0	0	0	0	0	1	0
425	Manhica	MAPUTO PROVINCIA	10	4	3	1891	1192	213	19	35	0	3	1	85	132	7	26	7	1	1	1	10	1	1	4	6	2	170.285.714.285.714	3	1.5	7	1	0	0	0	1	1	0	1	0	0	1	0.112638815	0.044949762	0.010047594	0.069804336	1	0.047619048	0
426	Marracuene	MAPUTO PROVINCIA	10	5	4	1564	1115	0	0	0	0	0	0	238	1	1	16	6	1	1	0	7	1	0	2	4	2	185.833.333.333.333	3	1.5	1	0	1	1	0	0	1	0	1	0	0	0	0	0.152173913	0	0.000639386	1	0.02739726	0
427	Marracuene	MAPUTO PROVINCIA	10	8	4	24	16	0	0	0	0	0	0	0	0	0	3	0	0	1	0	1	0	0	2	4	2	0	1	2.18	0	0	1	1	0	0	1	0	0	0	0	1	0	0	0	0	0	1	0
428	Maputo	MAPUTO PROVINCIA	10	6	4	1635	1236	1	0	0	0	0	0	120	0	0	26	6	0	1	0	7	0	0	1	0	0	206	3	2.18	0	0	1	0	0	0	0	0	1	0	0	1	0.000611621	0.073394495	0	0	0	0.105263158	0
429	Maputo	MAPUTO PROVINCIA	10	8	4	298	184	0	0	0	0	0	0	12	0	0	8	1	0	1	0	1	0	0	3	5	3	184	3	2.18	0	0	1	0	1	0	0	1	1	0	0	1	0	0.040268456	0	0	0	0.166666667	0
430	Maputo	MAPUTO PROVINCIA	10	7	4	4571	3020	0	0	0	0	0	0	0	278	0	32	4	1	1	0	6	2	0	4	6	2	755	3	2.18	0	0	1	0	0	1	1	0	1	0	0	1	0	0	0	0.060818202	0	0.078431373	0
431	Matutuine	MAPUTO PROVINCIA	10	7	4	90	90	0	0	0	0	0	0	0	0	0	8	1	0	1	0	1	0	0	1	0	0	90	3	2.18	0	0	1	0	0	0	0	0	1	0	0	1					1	0.666666667	0
432	Matutuine	MAPUTO PROVINCIA	10	8	4	62	62	0	0	0	0	0	0	0	0	0	3	1	0	1	0	1	0	0	2	3	0	62	3	2.18	0	0	1	1	0	0	0	0	1	0	0	1	0	0	0	0	1	1	0
433	Matutuine	MAPUTO PROVINCIA	10	8	4	50	50	0	0	0	0	0	0	0	0	0	3	0	0	0	0	0	0	0	1	0	1	0	1	2.18	0	0	1	0	0	0	0	0	0	0	0	1	0	0	0	0	1	1	0
434	Matutuine	MAPUTO PROVINCIA	10	6	4	328	240	0	2	1	0	0	0	0	19	0	10	1	1	1	0	4	1	0	3	5	3	240	3	2.18	0	0	1	0	1	0	0	1	1	0	0	0	0	0	0.006097561	0.057926829	1	0.045454545	0
435	Matutuine	MAPUTO PROVINCIA	10	7	4	170	81	0	0	0	0	0	0	10	1	0	3	1	0	1	0	1	0	0	1	0	1	81	3	2.18	0	0	1	0	0	0	0	0	1	0	0	1	0	0.058823529	0	0.005882353	0	1	0
436	Moamba	MAPUTO PROVINCIA	10	8	4	139	139	0	0	0	0	0	0	0	0	0	3	1	0	1	0	1	0	0	1	1	2	139	3	2.18	0	0	1	0	0	0	1	0	1	0	0	1	0	0	0	0	0	1	0
437	Moamba	MAPUTO PROVINCIA	10	8	4	28	28	0	0	0	0	0	0	0	0	0	11	1	0	1	0	1	0	0	1	0	3	28	3	2.18	0	0	1	0	0	0	0	1	1	0	0	1					1	0.285714286	0
438	Moamba	MAPUTO PROVINCIA	10	8	4	656	518	7	1	1	0	0	0	87	0	0	12	2	1	1	0	5	1	0	4	6	2	259	3	2.18	0	0	1	0	0	1	1	0	1	0	0	0	0.010670732	0.132621951	0.00152439	0	0	0.051282051	0
439	Moamba	MAPUTO PROVINCIA	10	8	4	246	198	2	0	0	0	0	0	28	0	0	7	2	0	1	0	3	0	0	2	4	3	99	3	2.18	0	0	1	1	0	0	0	1	1	0	0	1	0.008130081	0.113821138	0	0	0	0.125	0
440	Moamba	MAPUTO PROVINCIA	10	8	4	121	110	0	0	0	0	0	0	0	0	0	4	1	0	1	0	1	0	0	1	0	1	110	3	2.18	0	0	1	0	0	0	0	0	1	0	0	1	0	0	0	0	0	1	0
441	Namaacha	MAPUTO PROVINCIA	10	8	4	123	84	0	0	0	0	0	0	17	0	1	3	1	0	1	0	1	0	0	2	4	0	84	3	2.18	1	0	1	1	0	0	0	0	1	0	0	1	0	0.138211382	0	0	0	0.5	0
442	Namaacha	MAPUTO PROVINCIA	10	5	4	974	494	0	0	0	0	0	0	116	105	2	16	7	1	1	0	8	1	0	3	5	2	705.714.285.714.286	3	1.5	2	0	1	0	1	0	1	0	1	0	0	0	0	0.119096509	0	0.107802875	0	0.035087719	0
443	Maputo	MAPUTO CIDADE	11	2	2	13414	10043	156	83	89	4	3	6	89	110	244	80		1	1	1		8	0	3	5	2			1	14	0	0	0	1	0	1	0	0	0	0	0	0.011629641	0.006634859	0.006187565	0.008200388	0	0.061452514	1
444	Maputo	MAPUTO CIDADE	11	5	4	4814	3226	0	0	0	0	0	0	0	0	21	35		1	1	0						3			1	11	0	1	0	0	0	0	1	0	0	0	0	0	0	0	0	0	0.051282051	0
445	Maputo	MAPUTO CIDADE	11	2	2	11025	6929	163	607	0	0	7	14	0	6261	48	69		1	1	0		5		3	5	2			1	13	0	0	0	1	0	1	0	0	0	0	0	0.01478458	0	0.055056689	0.567891156	0	0.056390977	1
446	Maputo	MAPUTO CIDADE	11	5	4	2044	3305	0	0	0	0	0	0	250	0	0	38	6	1	1	0	6	1	0	2	4	3	550.833.333.333.333	3	1	0	0	1	1	0	0	0	1	1	0	0	0	0	0.122309198	0	0	0	0.044444444	0
447	Maputo	MAPUTO CIDADE	11	5	4	3213	2994	0	99	0	0	0	0	19	0	13	27		1	1	0				2	4	2			1	10	0	1	1	0	0	1	0	0	0	0	0	0	0.005913477	0.030812325	0	0	0.052631579	0
448	Maputo	MAPUTO CIDADE	11	8	4	1341	1341	0	0	0	0	0	0	9	0	0			1	1	0				3	5	1			3	0	0	1	0	1	0	0	0	0	0	0	0					0	0.090909091	0
449	Maputo	MAPUTO CIDADE	11	1	1	9328	6364	62	104	142	10	42	40	6	0	244	244	65	1	1	1	65	28	4	4	6	2	979.076.923.076.923	3	1	14	0	0	0	0	1	1	0	1	0	0	0	0.006646655	0.000643225	0.011149228	0	0	0.059791552	0
450	Maputo	MAPUTO CIDADE	11	2	2	4185	6047	0	0	0	0	0	0	82	0	0	50		1	1	0				2	4	2			1	0	0	0	1	0	0	1	0	0	0	0	0	0	0.019593787	0	0	0	0.031914894	1
[truncated: 4 more columns]
